# Supplementary material
Source: MDPI journal article supplement (https://www.mdpi.com/2077-1444/11/8/399)
Supplement: s1 [file s1]

## Supplemental Materials for Herzog 2020: Full List of Sampled Publications and Datasets

### *World Region Clusters*

- GLOBE. 2020. "Clusters of World Culture." Global Leadership and Organizational Behavior Effectiveness (GLOBE). 2020. [https://globeproject.com/about?page\\_id=intro#globe2020\\_intro](https://globeproject.com/about?page_id=intro#globe2020_intro).
- GPI. 2020. "World Regions." Global Philanthropy Indices. 2020. <https://globalindices.iupui.edu/environment/regions/index.html>.
- House, Robert J., and Paul J Hanges, eds. 2004. *Culture, Leadership, and Organizations: The GLOBE Study of 62 Societies*. Thousand Oaks, Calif: Sage Publications.
- UN. 2020. "Statistics Division Methodology: Standard Country or Area Codes for Statistical Use (M49)." United Nations Department of Economic and Social Affairs. 2020. <https://unstats.un.org/unsd/methodology/m49/>.
- UNC. 2020. "Where Is the Middle East?" University of North Carolina at Chapel Hill Center for Middle East and Islamic Studies. 2020. <https://mideast.unc.edu/where/>.
- WRD. 2020. "World Religion Database." Brill, International Religious Demographic Statistics and Sources. 2020. <https://brill.com/view/db/wrdo>.
- WVS. 2017. "Culture Map." World Values Survey. 2017. [http://www.worldvaluessurvey.org/images/Culture\\_Map\\_2017\\_conclusive.png](http://www.worldvaluessurvey.org/images/Culture_Map_2017_conclusive.png).

### *ARDA Cross-National Datasets Since 2010*

- Harris, Jaime, Roger Finke, and Robert Martin. 2010. "Dataset: ARDA National Profiles, 2011 Update: Religion Indexes, Adherents and Other Data." Association of Religion Data Archives (ARDA). <http://www.thearda.com/Archive/Files/Descriptions/INTL2008.asp>.
- Harris, Jaime, Robert Martin, Sarah Montminy, Roger Finke, and Association of Religion Data Archives. 2011. "Dataset: Cross-National Socio-Economic and Religion Data, 2011." Association of Religion Data Archives (ARDA). <http://www.thearda.com/Archive/Files/Descriptions/ECON11.asp>.
- Williams, Linda, and Davis Brown. 2017. "Dataset: Government Religious Preference 2.0 (GRP 2.0)." Association of Religion Data Archives (ARDA). <http://www.thearda.com/Archive/Files/Descriptions/GRPCOMP.asp>.
- Williams, Linda, Davis Brown, and Patrick James. 2017. "Dataset: Religious Characteristics of States Dataset Project: Demographics (RCS-Dem)." Association of Religion Data Archives (ARDA). <http://www.thearda.com/Archive/Files/Descriptions/RCSDEM2.asp>. <https://osf.io/7sr4m/>.
- Williams, Linda, and Jonathan Fox. 2016. "Dataset: The Religion and State Project." Association of Religion Data Archives (ARDA). <http://www.thearda.com/Archive/Files/Descriptions/RAS3COMP.asp>. <https://osf.io/zu47f/>.
- Williams, Linda, Zeev Maoz, and Errol Henderson. 2016a. "Dataset: World Religion Project: Global Religion Dataset." Association of Religion Data Archives (ARDA). <https://osf.io/j7bcm/>.
- — —. 2016b. "Dataset: World Religion Project: Global Religion Dataset: Global Restrictions on Religion." Association of Religion Data Archives (ARDA). [http://www.thearda.com/Archive/Files/Descriptions/PGR07\\_16.asp](http://www.thearda.com/Archive/Files/Descriptions/PGR07_16.asp). <https://osf.io/j7bcm/>.

### *ARDA Multiple Nation Datasets Since 2010*

- Bell, James. 2012. "Dataset: World's Muslims Data Set." Association of Religion Data Archives (ARDA). <https://osf.io/c2ve5/>.
- Kassem, Fatima Sbaity. 2010. "Dataset: Party Variation in Religiosity and Womens Leadership." Association of Religion Data Archives (ARDA). <https://osf.io/n4f36/>.
- Pollack, Detlef. 2010. "Dataset: Perception and Acceptance of Religious Diversity among the European Population." Association of Religion Data Archives (ARDA). <https://osf.io/bxpu8/>.
- Tessler, Mark. 2010. "Dataset: Carnegie Middle East Governance and Islam Dataset, 1988-2010." Association of Religion Data Archives. <http://www.thearda.com/Archive/Files/Descriptions/CARNEGIE.asp>.
- Woodward, Mark R. 2013. "Dataset: A Cross-National Survey of Muslim Attitudes." Association of Religion Data Archives (ARDA). <http://www.thearda.com/Archive/Files/Descriptions/MASWV2.asp>.
- Zurabishvili, Tinatin. 2012. "Dataset: Caucasus Barometer 2012." Association of Religion Data Archives (ARDA). <http://www.thearda.com/Archive/Files/Descriptions/CAUC12MG.asp>.

### **ARDA Single Nation Non-U.S. Datasets Since 2010**

- Chen, Zhuo. 2011. "Dataset: Study of Mysticism in Chinese Buddhist Monks and Nuns." Association of Religion Data Archives (ARDA). <https://osf.io/3qdj9/>.
- Wang, David C. 2015. "Dataset: Culturally Adapted Spiritually Oriented Trauma-Focused Cognitive-Behavioral Therapy for Child Survivors of Restavek." Association of Religion Data Archives (ARDA). <http://www.thearda.com/Archive/Files/Descriptions/CHILD.asp>.
- Williams, Linda. 2015. "Dataset: Pew Survey on Israel's Religiously Divided Society Data Set." Association of Religion Data Archives (ARDA). <https://osf.io/gsqvj/>.
- Williams, Linda, Nancy Roberts, and Sean Everton. 2011. "Dataset: Noordin Top Terrorist Network Data." Open Science Framework. <https://osf.io/zmb9c/>.

### **JSSR Africa Publications Since 2010**

- Agadjanian, Victor, and Scott T. Yabiku. 2015. "Religious Belonging, Religious Agency, and Women's Autonomy in Mozambique." *Journal for the Scientific Study of Religion* 54 (3): 461–76. <https://doi.org/10.1111/jssr.12210>.
- Al-Rawi, Ahmed. 2015. "Online Reactions to the Muhammad Cartoons: YouTube and the Virtual Ummah." *Journal for the Scientific Study of Religion* 54 (2): 261–76. <https://doi.org/10.1111/jssr.12191>.
- Augis, Erin. 2012. "Religion, Religiousness, and Narrative: Decoding Women's Practices in Senegalese Islamic Reform." *Journal for the Scientific Study of Religion* 51 (3): 429–41. <https://doi.org/10.1111/j.1468-5906.2012.01668.x>.
- Beck, Sedefka V., and Sara J. Gundersen. 2016. "A Gospel of Prosperity? An Analysis of the Relationship Between Religion and Earned Income in Ghana, the Most Religious Country in the World." *Journal for the Scientific Study of Religion* 55 (1): 105–29. <https://doi.org/10.1111/jssr.12247>.
- Bennett, Matthew R., and Christopher J. Einolf. 2017. "Religion, Altruism, and Helping Strangers: A Multilevel Analysis of 126 Countries." *Journal for the Scientific Study of Religion* 56 (2): 323–41. <https://doi.org/10.1111/jssr.12328>.
- Breznau, Nate, Valerie A. Lykes, Jonathan Kelley, and M. D. R. Evans. 2011. "A Clash of Civilizations? Preferences for Religious Political Leaders in 86 Nations." *Journal for the Scientific Study of Religion* 50 (4): 671–91. <https://doi.org/10.1111/j.1468-5906.2011.01605.x>.
- Brown, Davis. 2019. "Measuring Long-Term Patterns of Political Secularization and Desecularization: Did They Happen or Not?" *Journal for the Scientific Study of Religion* 58 (3): 570–90. <https://doi.org/10.1111/jssr.12610>.
- Buckley, David T., and Luis Felipe Mantilla. 2013. "God and Governance: Development, State Capacity, and the Regulation of Religion." *Journal for the Scientific Study of Religion* 52 (2): 328–48. <https://doi.org/10.1111/jssr.12025>.
- Conway, Brian, and Bram Spruyt. 2018. "Catholic Commitment Around the Globe: A 52- Country Analysis." *Journal for the Scientific Study of Religion* 57 (2): 276–99. <https://doi.org/10.1111/jssr.12512>.
- Corcoran, Katie E., David Pettinicchio, and Blaine Robbins. 2012. "Religion and the Acceptability of White-Collar Crime: A Cross-National Analysis." *Journal for the Scientific Study of Religion* 51 (3): 542–67. <https://doi.org/10.1111/j.1468-5906.2012.01669.x>.
- Dowd, Robert, and Ani Sarkissian. 2017. "The Roman Catholic Charismatic Movement and Civic Engagement in Sub-Saharan Africa." *Journal for the Scientific Study of Religion* 56 (3): 536–57. <https://doi.org/10.1111/jssr.12370>.
- Engelberg, Ari. 2016. "Religious Zionist Singles: Caught Between 'Family Values' and 'Young Adulthood.'" *Journal for the Scientific Study of Religion* 55 (2): 349–64. <https://doi.org/10.1111/jssr.12259>.
- Finke, Roger, and Robert R. Martin. 2014. "Ensuring Liberties: Understanding State Restrictions on Religious Freedoms." *Journal for the Scientific Study of Religion* 53 (4): 687–705. <https://doi.org/10.1111/jssr.12148>.
- Finke, Roger, Dane R. Mataic, and Jonathan Fox. 2017. "Assessing the Impact of Religious Registration." *Journal for the Scientific Study of Religion* 56 (4): 720–36. <https://doi.org/10.1111/jssr.12485>.
- González, Alessandra L. 2011. "Measuring Religiosity in a Majority Muslim Context: Gender, Religious Salience, and Religious Experience Among Kuwaiti College Students—A Research Note." *Journal for the Scientific Study of Religion* 50 (2): 339–50. <https://doi.org/10.1111/j.1468-5906.2011.01571.x>.
- Hadnes, Myriam, and Heiner Schumacher. 2012. "The Gods Are Watching: An Experimental Study of Religion and Traditional Belief in Burkina Faso." *Journal for the Scientific Study of Religion* 51 (4): 689–704. <https://doi.org/10.1111/j.1468-5906.2012.01676.x>.

- Hayford, Sarah R., and Jenny Trinitapoli. 2011. "Religious Differences in Female Genital Cutting: A Case Study from Burkina Faso." *Journal for the Scientific Study of Religion* 50 (2): 252–71. <https://doi.org/10.1111/j.1468-5906.2011.01566.x>.
- Kasselstrand, Isabella. 2019. "Secularity and Irreligion in Cross-National Context: A Nonlinear Approach." *Journal for the Scientific Study of Religion* 58 (3): 626–42. <https://doi.org/10.1111/jssr.12617>.
- Kollman, Paul. 2012. "Generations of Catholics in Eastern Africa: A Practice-Centered Analysis of Religious Change." *Journal for the Scientific Study of Religion* 51 (3): 412–28. <https://doi.org/10.1111/j.1468-5906.2012.01667.x>.
- Kucinskas, Jaime. 2010. "A Research Note on Islam and Gender Egalitarianism: An Examination of Egyptian and Saudi Arabian Youth Attitudes." *Journal for the Scientific Study of Religion* 49 (4): 761–70. <https://doi.org/10.1111/j.1468-5906.2010.01545.x>.
- Lawson, Ronald, and Ryan T. Cragun. 2012. "Comparing the Geographic Distributions and Growth of Mormons, Adventists, and Witnesses." *Journal for the Scientific Study of Religion* 51 (2): 220–40. <https://doi.org/10.1111/j.1468-5906.2012.01646.x>.
- Luria, Gil, Ram A. Cnaan, and Amnon Boehm. 2017. "Religious Attendance and Volunteering: Testing National Culture as a Boundary Condition." *Journal for the Scientific Study of Religion* 56 (3): 577–99. <https://doi.org/10.1111/jssr.12360>.
- Manglos-Weber, Nicolette D. 2017. "Identity, Inequality, and Legitimacy: Religious Differences in Primary School Completion in Sub-Saharan Africa." *Journal for the Scientific Study of Religion* 56 (2): 302–322.
- Manongi, Freddy S., and Peter J. Balint. 2014. "Prayer Behavior in Rural Kilimanjaro, Tanzania." *Journal for the Scientific Study of Religion* 53 (4): 760–74. <https://doi.org/10.1111/jssr.12146>.
- Mataic, Dane R. 2018. "Countries Mimicking Neighbors: The Spatial Diffusion of Governmental Restrictions on Religion." *Journal for the Scientific Study of Religion* 57 (2): 221–37. <https://doi.org/10.1111/jssr.12518>.
- Moaddel, Mansoor, and Stuart A. Karabenick. 2018. "Religious Fundamentalism in Eight Muslim-Majority Countries: Reconceptualization and Assessment." *Journal for the Scientific Study of Religion* 57 (4): 676–706. <https://doi.org/10.1111/jssr.12549>.
- Offutt, Stephen. 2011. "The Role of Short-Term Mission Teams in the New Centers of Global Christianity." *Journal for the Scientific Study of Religion* 50 (4): 796–811. <https://doi.org/10.1111/j.1468-5906.2011.01600.x>.
- Offutt, Stephen, LiErin Probasco, and Brandon Vaidyanathan. 2016. "Religion, Poverty, and Development." *Journal for the Scientific Study of Religion* 55 (2): 207–15. <https://doi.org/10.1111/jssr.12270>.
- Olson, Daniel V. A., and Miao Li. 2015. "Does a Nation's Religious Composition Affect Generalized Trust? The Role of Religious Heterogeneity and the Percent Religious." *Journal for the Scientific Study of Religion* 54 (4): 756–73. <https://doi.org/10.1111/jssr.12231>.
- Sarkissian, Ani. 2012. "Religion and Civic Engagement in Muslim Countries." *Journal for the Scientific Study of Religion* 51 (4): 607–22. <https://doi.org/10.1111/j.1468-5906.2012.01677.x>.
- Schnable, Allison. 2016. "What Religion Affords Grassroots NGOs: Frames, Networks, Modes of Action." *Journal for the Scientific Study of Religion* 55 (2): 216–32. <https://doi.org/10.1111/jssr.12272>.
- Schwadel, Philip. 2015. "Explaining Cross-National Variation in the Effect of Higher Education on Religiosity." *Journal for the Scientific Study of Religion* 54 (2): 402–18. <https://doi.org/10.1111/jssr.12187>.
- Starr, Chelsea, Kristin Waldo, and Matthew Kauffman. 2019. "Digital Irreligion: Christian Deconversion in an Online Community." *Journal for the Scientific Study of Religion* 58 (2): 494–512. <https://doi.org/10.1111/jssr.12599>.
- Tubergen, Frank Van, and Jörunn Í Sindradóttir. 2011. "The Religiosity of Immigrants in Europe: A Cross-National Study." *Journal for the Scientific Study of Religion* 50 (2): 272–88. <https://doi.org/10.1111/j.1468-5906.2011.01567.x>.
- Woods, Orlando. 2012. "Sri Lanka's Informal Religious Economy: Evangelical Competitiveness and Buddhist Hegemony in Perspective." *Journal for the Scientific Study of Religion* 51 (2): 203–19. <https://doi.org/10.1111/j.1468-5906.2012.01642.x>.

#### **JSSR Asia Publications Since 2010**

- Abu-Raiya, Hisham, Julie J. Exline, Kenneth I. Pargament, and Qutaiba Agbaria. 2015. "Prevalence, Predictors, and Implications of Religious/Spiritual Struggles Among Muslims." *Journal for the Scientific Study of Religion* 54 (4): 631–48. <https://doi.org/10.1111/jssr.12230>.
- Al-Rawi, Ahmed. 2015. "Online Reactions to the Muhammad Cartoons: YouTube and the Virtual Ummah." *Journal for the Scientific Study of Religion* 54 (2): 261–76. <https://doi.org/10.1111/jssr.12191>.

- Anthony, Francis-Vincent, Chris A. M. Hermans, and Carl Sterkens. 2010. "A Comparative Study of Mystical Experience Among Christian, Muslim, and Hindu Students in Tamil Nadu, India." *Journal for the Scientific Study of Religion* 49 (2): 264–77. <https://doi.org/10.1111/j.1468-5906.2010.01508.x>.
- Avishai, Orit. 2020. "Religious Queer People Beyond Identity Conflict: Lessons from Orthodox LGBT Jews in Israel." *Journal for the Scientific Study of Religion* n/a (n/a). <https://doi.org/10.1111/jssr.12650>.
- Barro, Robert, Jason Hwang, and Rachel McCleary. 2010. "Religious Conversion in 40 Countries." *Journal for the Scientific Study of Religion* 49 (1): 15–36. <https://doi.org/10.1111/j.1468-5906.2009.01490.x>.
- Barter, Shane Joshua, and Ian Zatzkin-Osborn. 2016. "Measuring Religion in War: A Response." *Journal for the Scientific Study of Religion* 55 (1): 190–93. <https://doi.org/10.1111/jssr.12255>.
- Barter, Shane, and Ian Zatzkin-Osborn. 2014. "Shrouded: Islam, War, and Holy War in Southeast Asia." *Journal for the Scientific Study of Religion* 53 (1): 187–201. <https://doi.org/10.1111/jssr.12080>.
- Bennett, Matthew R., and Christopher J. Einolf. 2017. "Religion, Altruism, and Helping Strangers: A Multilevel Analysis of 126 Countries." *Journal for the Scientific Study of Religion* 56 (2): 323–41. <https://doi.org/10.1111/jssr.12328>.
- Breznau, Nate, Valerie A. Lykes, Jonathan Kelley, and M. D. R. Evans. 2011. "A Clash of Civilizations? Preferences for Religious Political Leaders in 86 Nations." *Journal for the Scientific Study of Religion* 50 (4): 671–91. <https://doi.org/10.1111/j.1468-5906.2011.01605.x>.
- Brown, Davis. 2019. "Measuring Long-Term Patterns of Political Secularization and Desecularization: Did They Happen or Not?" *Journal for the Scientific Study of Religion* 58 (3): 570–90. <https://doi.org/10.1111/jssr.12610>.
- Buckley, David T., and Luis Felipe Mantilla. 2013. "God and Governance: Development, State Capacity, and the Regulation of Religion." *Journal for the Scientific Study of Religion* 52 (2): 328–48. <https://doi.org/10.1111/jssr.12025>.
- Cadge, Wendy, Peggy Levitt, and David Smilde. 2011. "De-Centering and Re-Centering: Rethinking Concepts and Methods in the Sociological Study of Religion." *Journal for the Scientific Study of Religion* 50 (3): 437–49. <https://doi.org/10.1111/j.1468-5906.2011.01585.x>.
- Chen, Zhuo, Ralph W. Hood Jr, Lijun Yang, and P. J. Watson. 2011. "Mystical Experience Among Tibetan Buddhists: The Common Core Thesis Revisited." *Journal for the Scientific Study of Religion* 50 (2): 328–38. <https://doi.org/10.1111/j.1468-5906.2011.01570.x>.
- Chen, Zhuo, Wen Qi, Ralph W. Hood, and P. J. Watson. 2011. "Common Core Thesis and Qualitative and Quantitative Analysis of Mysticism in Chinese Buddhist Monks and Nuns." *Journal for the Scientific Study of Religion* 50 (4): 654–70. <https://doi.org/10.1111/j.1468-5906.2011.01606.x>.
- Choi, Mihwa. 2012. "Extreme Asceticism: Confucian Practice and Riesebrodt's Religious Virtuoso." *Journal for the Scientific Study of Religion* 51 (3): 456–67. <https://doi.org/10.1111/j.1468-5906.2012.01665.x>.
- Conway, Brian, and Bram Spruyt. 2018. "Catholic Commitment Around the Globe: A 52- Country Analysis." *Journal for the Scientific Study of Religion* 57 (2): 276–99. <https://doi.org/10.1111/jssr.12512>.
- Corcoran, Katie E., David Pettinicchio, and Blaine Robbins. 2012. "Religion and the Acceptability of White-Collar Crime: A Cross-National Analysis." *Journal for the Scientific Study of Religion* 51 (3): 542–67. <https://doi.org/10.1111/j.1468-5906.2012.01669.x>.
- Dingemans, Ellen, and Erik Van Ingen. 2015. "Does Religion Breed Trust? A Cross-National Study of the Effects of Religious Involvement, Religious Faith, and Religious Context on Social Trust." *Journal for the Scientific Study of Religion* 54 (4): 739–55. <https://doi.org/10.1111/jssr.12217>.
- Ellis, Lee, Anthony W. Hoskin, and Malini Ratnasingam. 2016. "Testosterone, Risk Taking, and Religiosity: Evidence from Two Cultures." *Journal for the Scientific Study of Religion* 55 (1): 153–73. <https://doi.org/10.1111/jssr.12248>.
- Engelberg, Ari. 2016. "Religious Zionist Singles: Caught Between 'Family Values' and 'Young Adulthood.'" *Journal for the Scientific Study of Religion* 55 (2): 349–64. <https://doi.org/10.1111/jssr.12259>.
- Faranda, Regina D., and David B. Nolle. 2019. "The Mosaic of Muslim Religiosity and Social-Political Attitudes in Kyrgyzstan: A Gender-Based Exploration." *Journal for the Scientific Study of Religion* 58 (1): 114–37. <https://doi.org/10.1111/jssr.12573>.
- Finke, Roger, and Robert R. Martin. 2014. "Ensuring Liberties: Understanding State Restrictions on Religious Freedoms." *Journal for the Scientific Study of Religion* 53 (4): 687–705. <https://doi.org/10.1111/jssr.12148>.
- Finke, Roger, Dane R. Mataic, and Jonathan Fox. 2017. "Assessing the Impact of Religious Registration." *Journal for the Scientific Study of Religion* 56 (4): 720–36. <https://doi.org/10.1111/jssr.12485>.

- Ghorbani, Nima, P. J. Watson, Zoha Saeedi, Zhuo Chen, and Christopher F. Silver. 2012. "Religious Problem Solving and the Complexity of Religious Rationality Within an Iranian Muslim Ideological Surround." *Journal for the Scientific Study of Religion* 51 (4): 656–75. <https://doi.org/10.1111/j.1468-5906.2012.01686.x>.
- González, Alessandra L. 2011. "Measuring Religiosity in a Majority Muslim Context: Gender, Religious Salience, and Religious Experience Among Kuwaiti College Students—A Research Note." *Journal for the Scientific Study of Religion* 50 (2): 339–50. <https://doi.org/10.1111/j.1468-5906.2011.01571.x>.
- Gries, Peter, Jenny Su, and David Schak. 2012. "Toward the Scientific Study of Polytheism: Beyond Forced-Choice Measures of Religious Belief." *Journal for the Scientific Study of Religion* 51 (4): 623–37. <https://doi.org/10.1111/j.1468-5906.2012.01683.x>.
- Gurses, Mehmet, and Ahmet Erdi Ozturk. 2020. "Religion and Armed Conflict: Evidence from the Kurdish Conflict in Turkey." *Journal for the Scientific Study of Religion* First published online. <https://doi.org/10.1111/jssr.12652>.
- Hu, Anning, and Reid J. Leamaster. 2015. "Intergenerational Religious Mobility in Contemporary China." *Journal for the Scientific Study of Religion* 54 (1): 79–99. <https://doi.org/10.1111/jssr.12168>.
- Hu, Anning, Xiaozhao Yousef Yang, and Weixiang Luo. 2017. "Christian Identification and Self-Reported Depression: Evidence from China." *Journal for the Scientific Study of Religion* 56 (4): 765–80. <https://doi.org/10.1111/jssr.12482>.
- Huang, Ke-hsien. 2014. "Dyadic Nexus Fighting Two-Front Battles: A Study of the Microlevel Process of the Official-Religion-State Relationship in China." *Journal for the Scientific Study of Religion* 53 (4): 706–21. <https://doi.org/10.1111/jssr.12149>.
- . 2016. "Sect-to-Church Movement in Globalization: Transforming Pentecostalism and Coastal Intermediaries in Contemporary China." *Journal for the Scientific Study of Religion* 55 (2): 407–16. <https://doi.org/10.1111/jssr.12257>.
- Kasselstrand, Isabella. 2019. "Secularity and Irreligion in Cross-National Context: A Nonlinear Approach." *Journal for the Scientific Study of Religion* 58 (3): 626–42. <https://doi.org/10.1111/jssr.12617>.
- Kim, Jibum, Sang-Wook Kim, and Jeong-Han Kang. 2010. "Confidence in Religious Leaders in Korea: A Research Note." *Journal for the Scientific Study of Religion* 49 (2): 320–27. <https://doi.org/10.1111/j.1468-5906.2010.01512.x>.
- Kucinkas, Jaime. 2010. "A Research Note on Islam and Gender Egalitarianism: An Examination of Egyptian and Saudi Arabian Youth Attitudes." *Journal for the Scientific Study of Religion* 49 (4): 761–70. <https://doi.org/10.1111/j.1468-5906.2010.01545.x>.
- Kurien, Prema. 2014. "The Impact of International Migration on Home Churches: The Mar Thoma Syrian Christian Church in India." *Journal for the Scientific Study of Religion* 53 (1): 109–29. <https://doi.org/10.1111/jssr.12082>.
- Lawson, Ronald, and Ryan T. Cragun. 2012. "Comparing the Geographic Distributions and Growth of Mormons, Adventists, and Witnesses." *Journal for the Scientific Study of Religion* 51 (2): 220–40. <https://doi.org/10.1111/j.1468-5906.2012.01646.x>.
- Liu, Eric Y. 2010. "Are Risk-Taking Persons Less Religious? Risk Preference, Religious Affiliation, and Religious Participation in Taiwan." *Journal for the Scientific Study of Religion* 49 (1): 172–78. <https://doi.org/10.1111/j.1468-5906.2009.01499.x>.
- Lu, Jun, and Qin Gao. 2018. "Contesting Chineseness: An Examination of Religion and National Identity in Mainland China." *Journal for the Scientific Study of Religion* 57 (2): 318–40. <https://doi.org/10.1111/jssr.12519>.
- Luria, Gil, Ram A. Cnaan, and Amnon Boehm. 2017. "Religious Attendance and Volunteering: Testing National Culture as a Boundary Condition." *Journal for the Scientific Study of Religion* 56 (3): 577–99. <https://doi.org/10.1111/jssr.12360>.
- Lussier, Danielle N. 2019. "Mosques, Churches, and Civic Skill Opportunities in Indonesia." *Journal for the Scientific Study of Religion* 58 (2): 415–38. <https://doi.org/10.1111/jssr.12589>.
- Mataic, Dane R. 2018. "Countries Mimicking Neighbors: The Spatial Diffusion of Governmental Restrictions on Religion." *Journal for the Scientific Study of Religion* 57 (2): 221–37. <https://doi.org/10.1111/jssr.12518>.
- McKendry-Smith, Emily. 2016. "'Baba Has Come to Civilize Us': Developmental Idealism and Framing the Strict Demands of the Brahma Kumaris." *Journal for the Scientific Study of Religion* 55 (4): 698–716. <https://doi.org/10.1111/jssr.12297>.
- Minton, Elizabeth A., Lynn R. Kahle, Tan Soo Jiuan, and Siok Kuan Tambyah. 2016. "Addressing Criticisms of Global Religion Research: A Consumption-Based Exploration of Status and Materialism, Sustainability, and

- Volunteering Behavior." *Journal for the Scientific Study of Religion* 55 (2): 365–83.  
<https://doi.org/10.1111/jssr.12260>.
- Moaddel, Mansoor, and Stuart A. Karabenick. 2018. "Religious Fundamentalism in Eight Muslim-Majority Countries: Reconceptualization and Assessment." *Journal for the Scientific Study of Religion* 57 (4): 676–706.  
<https://doi.org/10.1111/jssr.12549>.
- Olson, Daniel V. A., and Miao Li. 2015. "Does a Nation's Religious Composition Affect Generalized Trust? The Role of Religious Heterogeneity and the Percent Religious." *Journal for the Scientific Study of Religion* 54 (4): 756–73.  
<https://doi.org/10.1111/jssr.12231>.
- Raynold, Prosper. 2014. "Sacrifice and Stigma: Managing Religious Risk." *Journal for the Scientific Study of Religion* 53 (4): 826–47. <https://doi.org/10.1111/jssr.12153>.
- Ruah-Midbar, Marianna, and Adam Klin-Oron. 2013. "'Tell Me Who Your Enemies Are': Government Reports About the 'Cult' Phenomenon in Israel." *Journal for the Scientific Study of Religion* 52 (4): 810–26.  
<https://doi.org/10.1111/jssr.12067>.
- Sansani, Shahar. 2019. "Are the Religiously Observant Discriminated Against in the Rental Housing Market? Experimental Evidence from Israel." *Journal for the Scientific Study of Religion* 58 (2): 459–74.  
<https://doi.org/10.1111/jssr.12596>.
- Sarkissian, Ani. 2012. "Religion and Civic Engagement in Muslim Countries." *Journal for the Scientific Study of Religion* 51 (4): 607–22. <https://doi.org/10.1111/j.1468-5906.2012.01677.x>.
- Schnabel, Landon, Conrad Hackett, and David McClendon. 2018. "Where Men Appear More Religious Than Women: Turning a Gender Lens on Religion in Israel." *Journal for the Scientific Study of Religion* 57 (1): 80–94.  
<https://doi.org/10.1111/jssr.12498>.
- Schnabel, Allison. 2016. "What Religion Affords Grassroots NGOs: Frames, Networks, Modes of Action." *Journal for the Scientific Study of Religion* 55 (2): 216–32. <https://doi.org/10.1111/jssr.12272>.
- Schwadel, Philip. 2015. "Explaining Cross-National Variation in the Effect of Higher Education on Religiosity." *Journal for the Scientific Study of Religion* 54 (2): 402–18. <https://doi.org/10.1111/jssr.12187>.
- Shor, Eran, and David J. Roelfs. 2013. "The Longevity Effects of Religious and Nonreligious Participation: A Meta-Analysis and Meta-Regression." *Journal for the Scientific Study of Religion* 52 (1): 120–45.  
<https://doi.org/10.1111/jssr.12006>.
- Shulgin, Sergey, Julia Zinkina, and Andrey Korotayev. 2019. "Religiosity and Aging: Age and Cohort Effects and Their Implications for the Future of Religious Values in High-Income OECD Countries." *Journal for the Scientific Study of Religion* 58 (3): 591–603. <https://doi.org/10.1111/jssr.12613>.
- Silva, Chikako Ozawa-de, and Brendan Ozawa-de Silva. 2010. "Secularizing Religious Practices: A Study of Subjectivity and Existential Transformation in Naikan Therapy." *Journal for the Scientific Study of Religion* 49 (1): 147–61. <https://doi.org/10.1111/j.1468-5906.2010.01497.x>.
- Svensson, Isak. 2016. "Conceptualizing the Religious Dimensions of Armed Conflicts: A Response to 'Shrouded: Islam, War, and Holy War in Southeast Asia.'" *Journal for the Scientific Study of Religion* 55 (1): 185–89.  
<https://doi.org/10.1111/jssr.12251>.
- T, Oth Vilaythong, Nicole M. Lindner, and Brian A. Nosek. 2010. "'Do Unto Others': Effects of Priming the Golden Rule on Buddhists' and Christians' Attitudes Toward Gay People." *Journal for the Scientific Study of Religion* 49 (3): 494–506. <https://doi.org/10.1111/j.1468-5906.2010.01524.x>.
- Thomson, Robert A., Sharan Kaur Mehta, and Elaine Howard Ecklund. 2020. "'Doing Gender' and 'Doing Religion' in Science: A Cross-National Examination." *Journal for the Scientific Study of Religion* First published online.  
<https://doi.org/10.1111/jssr.12654>.
- VanHeuvelen, Tom. 2014. "The Religious Context of Welfare Attitudes." *Journal for the Scientific Study of Religion* 53 (2): 268–95. <https://doi.org/10.1111/jssr.12118>.
- Voas, David. 2014. "Does Education Develop or Diminish Spirituality in Taiwan?" *Journal for the Scientific Study of Religion* 53 (3): 556–74. <https://doi.org/10.1111/jssr.12128>.
- Wang, Ray. 2017. "Authoritarian Resilience Versus Everyday Resistance: The Unexpected Strength of Religious Advocacy in Promoting Transnational Activism in China." *Journal for the Scientific Study of Religion* 56 (3): 558–76. <https://doi.org/10.1111/jssr.12366>.
- Wei, Dedong, and Eric Y. Liu. 2013. "Religious Involvement and Depression: Evidence for Curvilinear and Stress-Moderating Effects Among Young Women in Rural China." *Journal for the Scientific Study of Religion* 52 (2): 349–67. <https://doi.org/10.1111/jssr.12031>.

- Woods, Orlando. 2012. "Sri Lanka's Informal Religious Economy: Evangelical Competitiveness and Buddhist Hegemony in Perspective." *Journal for the Scientific Study of Religion* 51 (2): 203–19. <https://doi.org/10.1111/j.1468-5906.2012.01642.x>.
- — —. 2018. "Spaces of the Religious Economy: Negotiating the Regulation of Religious Space in Singapore." *Journal for the Scientific Study of Religion* 57 (3): 531–46. <https://doi.org/10.1111/jssr.12531>.
- Wright, Stuart A., and Susan J. Palmer. 2018. "Countermovement Mobilization and State Raids on Minority Religious Communities." *Journal for the Scientific Study of Religion* 57 (3): 616–33. <https://doi.org/10.1111/jssr.12541>.
- Yang, Fenggang. 2016. "Exceptionalism or Chinamerica: Measuring Religious Change in the Globalizing World Today." *Journal for the Scientific Study of Religion* 55 (1): 7–22. <https://doi.org/10.1111/jssr.12253>.
- Yang, Fenggang, and Anning Hu. 2012. "Mapping Chinese Folk Religion in Mainland China and Taiwan." *Journal for the Scientific Study of Religion* 51 (3): 505–21. <https://doi.org/10.1111/j.1468-5906.2012.01660.x>.
- Yeniaras, Volkan, and K. Ali Akkemik. 2017. "Materialism and Fashion Consciousness: The Moderating Role of Status Consumption Tendencies and Religiosity." *Journal for the Scientific Study of Religion* 56 (3): 498–513. <https://doi.org/10.1111/jssr.12363>.
- Zhai, Jiexia Elisa, and Robert D. Woodberry. 2011. "Religion and Educational Ideals in Contemporary Taiwan." *Journal for the Scientific Study of Religion* 50 (2): 307–27. <https://doi.org/10.1111/j.1468-5906.2011.01569.x>.
- Zukerman, Gil, Liat Korn, Ephraim Shapiro, and Leah Fostick. 2016. "Avoidance Behavior Following Terror Event Exposure: Effects of Perceived Life Threat and Jewish Religious Coping." *Journal for the Scientific Study of Religion* 55 (3): 516–30. <https://doi.org/10.1111/jssr.12283>.

#### **JSSR Publications Since 2010**

- Aarts, Olav, Ariana Need, Manfred Te Grotenhuis, and Nan Dirk De Graaf. 2010. "Does Duration of Deregulated Religious Markets Affect Church Attendance? Evidence from 26 Religious Markets in Europe and North America Between 1981 and 2006." *Journal for the Scientific Study of Religion* 49 (4): 657–72. <https://doi.org/10.1111/j.1468-5906.2010.01535.x>.
- Abulof, Uriel. 2014. "The Roles of Religion in National Legitimation: Judaism and Zionism's Elusive Quest for Legitimacy." *Journal for the Scientific Study of Religion* 53 (3): 515–33. <https://doi.org/10.1111/jssr.12132>.
- Abu-Raiya, Hisham, Julie J. Exline, Kenneth I. Pargament, and Qutaiba Agbaria. 2015. "Prevalence, Predictors, and Implications of Religious/Spiritual Struggles Among Muslims." *Journal for the Scientific Study of Religion* 54 (4): 631–48. <https://doi.org/10.1111/jssr.12230>.
- Acevedo, Gabriel A., and Ali R. Chaudhary. 2015. "Religion, Cultural Clash, and Muslim American Attitudes About Politically Motivated Violence." *Journal for the Scientific Study of Religion* 54 (2): 242–60. <https://doi.org/10.1111/jssr.12185>.
- Adamczyk, Amy. 2012. "Investigating the Role of Religion-Supported Secular Programs for Explaining Initiation into First Sex." *Journal for the Scientific Study of Religion* 51 (2): 324–42. <https://doi.org/10.1111/j.1468-5906.2012.01644.x>.
- adams, jimi, David R. Schaefer, and Andrea Vest Ettekal. 2020. "Crafting Mosaics: Person-Centered Religious Influence and Selection in Adolescent Friendships." *Journal for the Scientific Study of Religion* 59 (1): 39–61. <https://doi.org/10.1111/jssr.12638>.
- Adler Jr., Gary J., and Stephen Offutt. 2017. "The Gift Economy of Direct Transnational Civic Action: How Reciprocity and Inequality Are Managed in Religious 'Partnerships.'" *Journal for the Scientific Study of Religion* 56 (3): 600–619. <https://doi.org/10.1111/jssr.12369>.
- Agadjanian, Victor, and Scott T. Yabiku. 2015. "Religious Belonging, Religious Agency, and Women's Autonomy in Mozambique." *Journal for the Scientific Study of Religion* 54 (3): 461–76. <https://doi.org/10.1111/jssr.12210>.
- Agirdag, Orhan, Patrick Loobuyck, and Mieke Van Houtte. 2012. "Determinants of Attitudes Toward Muslim Students Among Flemish Teachers: A Research Note." *Journal for the Scientific Study of Religion* 51 (2): 368–76. <https://doi.org/10.1111/j.1468-5906.2012.01637.x>.
- Ahmed, Ali, and Osvaldo Salas. 2013. "Religious Context and Prosociality: An Experimental Study from Valparaíso, Chile." *Journal for the Scientific Study of Religion* 52 (3): 627–37. <https://doi.org/10.1111/jssr.12045>.
- Ai, Amy L., Roslyn Richardson, Carol Plummer, Christopher G. Ellison, Catherine Lemieux, Terrence N. Tice, and Bu Huang. 2013. "Character Strengths and Deep Connections Following Hurricanes Katrina and Rita: Spiritual and Secular Pathways to Resistance Among Volunteers." *Journal for the Scientific Study of Religion* 52 (3): 537–56. <https://doi.org/10.1111/jssr.12043>.

- Alfani, Guido, Vincent Gourdon, and Agnese Vitali. 2012. "Social Customs and Demographic Change: The Case of Godparenthood in Catholic Europe." *Journal for the Scientific Study of Religion* 51 (3): 482–504. <https://doi.org/10.1111/j.1468-5906.2012.01659.x>.
- Alm, Susanne, and Lena Roxell. 2019. "Your Own Personal Jesus? Doctrinal Beliefs Versus Personal Spirituality Among Inmates Involved in the Monastery Route in Swedish Prisons." *Journal for the Scientific Study of Religion* 58 (1): 192–209. <https://doi.org/10.1111/jssr.12579>.
- Alper, Becka A., and Daniel V. A. Olson. 2011. "Do Jews Feel Like Outsiders in America? The Impact of Anti-Semitism, Friendships, and Religious Geography." *Journal for the Scientific Study of Religion* 50 (4): 822–30. <https://doi.org/10.1111/j.1468-5906.2011.01599.x>.
- Al-Rawi, Ahmed. 2015. "Online Reactions to the Muhammad Cartoons: YouTube and the Virtual Ummah." *Journal for the Scientific Study of Religion* 54 (2): 261–76. <https://doi.org/10.1111/jssr.12191>.
- Ammerman, Nancy T. 2013. "Spiritual But Not Religious? Beyond Binary Choices in the Study of Religion." *Journal for the Scientific Study of Religion* 52 (2): 258–78. <https://doi.org/10.1111/jssr.12024>.
- Anderson, Cory, Joseph Donnermeyer, Jeffrey Longhofer, and Steven D. Reschly. 2019. "A Critical Appraisal of Amish Studies' De Facto Paradigm, 'Negotiating with Modernity.'" *Journal for the Scientific Study of Religion* 58 (3): 725–42. <https://doi.org/10.1111/jssr.12600>.
- Anthony, Francis-Vincent, Chris A. M. Hermans, and Carl Sterkens. 2010. "A Comparative Study of Mystical Experience Among Christian, Muslim, and Hindu Students in Tamil Nadu, India." *Journal for the Scientific Study of Religion* 49 (2): 264–77. <https://doi.org/10.1111/j.1468-5906.2010.01508.x>.
- Arnon, Daniel. 2018. "The Enduring Influence of Religion on Senators' Legislative Behavior." *Journal for the Scientific Study of Religion* 57 (3): 567–84. <https://doi.org/10.1111/jssr.12535>.
- Astor, Avi, Marian Burchardt, and Mar Grier. 2017. "The Politics of Religious Heritage: Framing Claims to Religion as Culture in Spain." *Journal for the Scientific Study of Religion* 56 (1): 126–42. <https://doi.org/10.1111/jssr.12321>.
- Astor, Avi, and Damon Mayrl. 2020. "Culturalized Religion: A Synthetic Review and Agenda for Research." *Journal for the Scientific Study of Religion* n/a (n/a). <https://doi.org/10.1111/jssr.12661>.
- Audette, Andre P., Mark Brockway, and Rodrigo Castro Cornejo. 2020. "Religious Engagement, Civic Skills, and Political Participation in Latin America." *Journal for the Scientific Study of Religion* 59 (1): 101–18. <https://doi.org/10.1111/jssr.12642>.
- Augis, Erin. 2012. "Religion, Religiousness, and Narrative: Decoding Women's Practices in Senegalese Islamic Reform." *Journal for the Scientific Study of Religion* 51 (3): 429–41. <https://doi.org/10.1111/j.1468-5906.2012.01668.x>.
- Avishai, Orit. 2020. "Religious Queer People Beyond Identity Conflict: Lessons from Orthodox LGBT Jews in Israel." *Journal for the Scientific Study of Religion* n/a (n/a). <https://doi.org/10.1111/jssr.12650>.
- Ayers, John W., C. Richard Hofstetter, Veronica L. Irvin, Yoonju Song, Hae-Ryun Park, Hee-Yong Paik, and Melbourne F. Hovell. 2010. "Can Religion Help Prevent Obesity? Religious Messages and the Prevalence of Being Overweight or Obese Among Korean Women in California." *Journal for the Scientific Study of Religion* 49 (3): 536–49. <https://doi.org/10.1111/j.1468-5906.2010.01527.x>.
- Bader, Christopher D., Joseph O. Baker, and Andrea Molle. 2012. "Countervailing Forces: Religiosity and Paranormal Belief in Italy." *Journal for the Scientific Study of Religion* 51 (4): 705–20. <https://doi.org/10.1111/j.1468-5906.2012.01674.x>.
- Bader, Christopher D., and Roger Finke. 2014. "Toward Assessing and Improving Survey Questions on Religion: The ARDA's Measurement Wizard." *Journal for the Scientific Study of Religion* 53 (3): 652–61. <https://doi.org/10.1111/jssr.12131>.
- Baker, Joseph O. 2013. "Acceptance of Evolution and Support for Teaching Creationism in Public Schools: The Conditional Impact of Educational Attainment." *Journal for the Scientific Study of Religion* 52 (1): 216–28. <https://doi.org/10.1111/jssr.12007>.
- Baker, Joseph O., and Scott Draper. 2010. "Diverse Supernatural Portfolios: Certitude, Exclusivity, and the Curvilinear Relationship Between Religiosity and Paranormal Beliefs." *Journal for the Scientific Study of Religion* 49 (3): 413–24. <https://doi.org/10.1111/j.1468-5906.2010.01519.x>.
- Bakker, Janel Kragt, and Jenell Paris. 2013. "Bereavement and Religion Online: Stillbirth, Neonatal Loss, and Parental Religiosity." *Journal for the Scientific Study of Religion* 52 (4): 657–74. <https://doi.org/10.1111/jssr.12066>.
- Barrett, Justin L. 2011. "Cognitive Science of Religion: Looking Back, Looking Forward." *Journal for the Scientific Study of Religion* 50 (2): 229–39. <https://doi.org/10.1111/j.1468-5906.2011.01564.x>.



- Barro, Robert, Jason Hwang, and Rachel McCleary. 2010. "Religious Conversion in 40 Countries." *Journal for the Scientific Study of Religion* 49 (1): 15–36. <https://doi.org/10.1111/j.1468-5906.2009.01490.x>.
- Barter, Shane Joshua, and Ian Zatzkin-Osburn. 2016. "Measuring Religion in War: A Response." *Journal for the Scientific Study of Religion* 55 (1): 190–93. <https://doi.org/10.1111/jssr.12255>.
- Barter, Shane, and Ian Zatzkin-Osburn. 2014. "Shrouded: Islam, War, and Holy War in Southeast Asia." *Journal for the Scientific Study of Religion* 53 (1): 187–201. <https://doi.org/10.1111/jssr.12080>.
- Bartkowski, John P., Aida I. Ramos-Wada, Chris G. Ellison, and Gabriel A. Acevedo. 2012. "Faith, Race-Ethnicity, and Public Policy Preferences: Religious Schemas and Abortion Attitudes Among U.S. Latinos." *Journal for the Scientific Study of Religion* 51 (2): 343–58. <https://doi.org/10.1111/j.1468-5906.2012.01645.x>.
- Bean, Lydia. 2014. "Compassionate Conservatives? Evangelicals, Economic Conservatism, and National Identity." *Journal for the Scientific Study of Religion* 53 (1): 164–86. <https://doi.org/10.1111/jssr.12087>.
- Becci, Irene, and Joshua Dubler. 2017. "Religion and Religions in Prisons: Observations from the United States and Europe." *Journal for the Scientific Study of Religion* 56 (2): 241–47. <https://doi.org/10.1111/jssr.12352>.
- Beck, Sedefka V. 2016. "Wage Differentials in the United States: Does Religious Participation Matter?" *Journal for the Scientific Study of Religion* 55 (3): 558–78. <https://doi.org/10.1111/jssr.12286>.
- Beck, Sedefka V., and Sara J. Gundersen. 2016. "A Gospel of Prosperity? An Analysis of the Relationship Between Religion and Earned Income in Ghana, the Most Religious Country in the World." *Journal for the Scientific Study of Religion* 55 (1): 105–29. <https://doi.org/10.1111/jssr.12247>.
- Becker, George. 2011. "Challenging Merton's Protestantism-Science Hypothesis: The Historical Impact of Sacerdotal Celibacy on German Science and Scholarship." *Journal for the Scientific Study of Religion* 50 (2): 351–65. <https://doi.org/10.1111/j.1468-5906.2011.01572.x>.
- Bengtson, Vern L., R. David Hayward, Phil Zuckerman, and Merrill Silverstein. 2018. "Bringing Up Nones: Intergenerational Influences and Cohort Trends." *Journal for the Scientific Study of Religion* 57 (2): 258–75. <https://doi.org/10.1111/jssr.12511>.
- Bengtson, Vern L., Merrill Silverstein, Norella M. Putney, and Susan C. Harris. 2015. "Does Religiousness Increase with Age? Age Changes and Generational Differences Over 35 Years." *Journal for the Scientific Study of Religion* 54 (2): 363–79. <https://doi.org/10.1111/jssr.12183>.
- Bengtsson, Niklas. 2019. "Are Religions for Sale? Evidence from the Swedish Church Revolt Over Same-Sex Marriage." *Journal for the Scientific Study of Religion* 58 (2): 336–59. <https://doi.org/10.1111/jssr.12592>.
- Benjamins, Maureen R. 2012. "Religious Beliefs, Diet, and Physical Activity Among Jewish Adolescents." *Journal for the Scientific Study of Religion* 51 (3): 588–97. <https://doi.org/10.1111/j.1468-5906.2012.01658.x>.
- Bennett, Matthew R., and Christopher J. Einolf. 2017. "Religion, Altruism, and Helping Strangers: A Multilevel Analysis of 126 Countries." *Journal for the Scientific Study of Religion* 56 (2): 323–41. <https://doi.org/10.1111/jssr.12328>.
- Berghammer, Caroline, Ulrike Zartler, and Desiree Krivanek. 2017. "Looking Beyond the Church Tax: Families and the Disaffiliation of Austrian Roman Catholics." *Journal for the Scientific Study of Religion* 56 (3): 514–35. <https://doi.org/10.1111/jssr.12361>.
- Berghuijs, Joantine, Cok Bakker, and Jos Pieper. 2013. "New Spirituality and Social Engagement." *Journal for the Scientific Study of Religion* 52 (4): 775–92. <https://doi.org/10.1111/jssr.12062>.
- Beyerlein, Kraig, Jenny Trinitapoli, and Gary Adler. 2011. "The Effect of Religious Short-Term Mission Trips on Youth Civic Engagement." *Journal for the Scientific Study of Religion* 50 (4): 780–95. <https://doi.org/10.1111/j.1468-5906.2011.01607.x>.
- Bibby, Reginald W. 2011. "Continuing the Conversation on Canada: Changing Patterns of Religious Service Attendance." *Journal for the Scientific Study of Religion* 50 (4): 831–37. [https://doi.org/10.1111/j.1468-5906.2011.01596\\_1.x](https://doi.org/10.1111/j.1468-5906.2011.01596_1.x).
- Bielo, James S. 2017. "The Question of Cultural Change in the Social Scientific Study of Religion: Notes from the Emerging Church." *Journal for the Scientific Study of Religion* 56 (1): 19–25. <https://doi.org/10.1111/jssr.12323>.
- Blankholm, Joseph. 2014. "The Political Advantages of a Polysemous Secular." *Journal for the Scientific Study of Religion* 53 (4): 775–90. <https://doi.org/10.1111/jssr.12152>.
- Blogowska, Joanna, Catherine Lambert, and Vassilis Saroglou. 2013. "Religious Prosociality and Aggression: It's Real." *Journal for the Scientific Study of Religion* 52 (3): 524–36. <https://doi.org/10.1111/jssr.12048>.

- Blogowska, Joanna, and Vassilis Saroglou. 2011. "Religious Fundamentalism and Limited Prosociality as a Function of the Target." *Journal for the Scientific Study of Religion* 50 (1): 44–60. <https://doi.org/10.1111/j.1468-5906.2010.01551.x>.
- Bobkowski, Piotr S., and Sriram Kalyanaraman. 2010. "Effects of Online Christian Self-Disclosure on Impression Formation." *Journal for the Scientific Study of Religion* 49 (3): 456–76. <https://doi.org/10.1111/j.1468-5906.2010.01522.x>.
- Bobkowski, Piotr S., and Lisa D. Pearce. 2011. "Baring Their Souls in Online Profiles or Not? Religious Self-Disclosure in Social Media." *Journal for the Scientific Study of Religion* 50 (4): 744–62. <https://doi.org/10.1111/j.1468-5906.2011.01597.x>.
- Bok, Jared. 2014. "Symbolic Filtering: Selectively Permeable Evangelical Boundaries in an Age of Religious Pluralism." *Journal for the Scientific Study of Religion* 53 (4): 808–25. <https://doi.org/10.1111/jssr.12145>.
- Bones, Paul D. C., and Soheil Sabriseilabi. 2018. "Sinners in the Hands of an Angry God: An Exploration of Religious Forces on Support for the Death Penalty." *Journal for the Scientific Study of Religion* 57 (4): 707–22. <https://doi.org/10.1111/jssr.12553>.
- Bradshaw, William S., Tim B. Heaton, Ellen Decoo, John P. Dehlin, Renee V. Galliher, and Katherine A. Crowell. 2015. "Religious Experiences ofGBTQ Mormon Males." *Journal for the Scientific Study of Religion* 54 (2): 311–29. <https://doi.org/10.1111/jssr.12181>.
- Brauer, Jonathan R., Charles R. Tittle, and Olena Antonaccio. 2013. "Does Religion Suppress, Socialize, Soothe, or Support? Exploring Religiosity's Influence on Crime." *Journal for the Scientific Study of Religion* 52 (4): 753–74. <https://doi.org/10.1111/jssr.12063>.
- Brauer, Simon. 2018. "The Surprising Predictable Decline of Religion in the United States." *Journal for the Scientific Study of Religion* 57 (4): 654–75. <https://doi.org/10.1111/jssr.12551>.
- Brauer, Simon G. 2017. "How Many Congregations Are There? Updating a Survey-Based Estimate." *Journal for the Scientific Study of Religion* 56 (2): 438–48. <https://doi.org/10.1111/jssr.12330>.
- Braunstein, Ruth. 2012. "Storytelling in Liberal Religious Advocacy." *Journal for the Scientific Study of Religion* 51 (1): 110–27. <https://doi.org/10.1111/j.1468-5906.2012.01634.x>.
- Brenner, Philip S. 2011. "Identity Importance and the Overreporting of Religious Service Attendance: Multiple Imputation of Religious Attendance Using the American Time Use Study and the General Social Survey." *Journal for the Scientific Study of Religion* 50 (1): 103–15. <https://doi.org/10.1111/j.1468-5906.2010.01554.x>.
- . 2012. "Identity as a Determinant of the Overreporting of Church Attendance in Canada." *Journal for the Scientific Study of Religion* 51 (2): 377–85. <https://doi.org/10.1111/j.1468-5906.2012.01640.x>.
- Breskaya, Olga, Giuseppe Giordan, and James T. Richardson. 2018. "Human Rights and Religion: A Sociological Perspective." *Journal for the Scientific Study of Religion* 57 (3): 419–31. <https://doi.org/10.1111/jssr.12544>.
- Breslin, Michael J., Christopher Alan Lewis, and Mark Shevlin. 2010. "A Psychometric Evaluation of Poloma and Pendleton's (1991) and Ladd and Spilka's (2002, 2006) Measures of Prayer." *Journal for the Scientific Study of Religion* 49 (4): 710–23. <https://doi.org/10.1111/j.1468-5906.2010.01541.x>.
- Breznau, Nate, Valerie A. Lykes, Jonathan Kelley, and M. D. R. Evans. 2011. "A Clash of Civilizations? Preferences for Religious Political Leaders in 86 Nations." *Journal for the Scientific Study of Religion* 50 (4): 671–91. <https://doi.org/10.1111/j.1468-5906.2011.01605.x>.
- Brint, Steven, and Seth Abrutyn. 2010. "Who's Right About the Right? Comparing Competing Explanations of the Link Between White Evangelicals and Conservative Politics in the United States." *Journal for the Scientific Study of Religion* 49 (2): 328–50. <https://doi.org/10.1111/j.1468-5906.2010.01513.x>.
- Brown, Davis. 2016. "The Influence of Religion on Interstate Armed Conflict: Government Religious Preference and First Use of Force, 1946–2002." *Journal for the Scientific Study of Religion* 55 (4): 800–820. <https://doi.org/10.1111/jssr.12292>.
- . 2019. "Measuring Long-Term Patterns of Political Secularization and Desecularization: Did They Happen or Not?" *Journal for the Scientific Study of Religion* 58 (3): 570–90. <https://doi.org/10.1111/jssr.12610>.
- Brown, Ronald E., R. Khari Brown, Davin Phoenix, and James S. Jackson. 2016. "Race, Religion, and Anti-Poverty Policy Attitudes." *Journal for the Scientific Study of Religion* 55 (2): 308–23. <https://doi.org/10.1111/jssr.12258>.
- Brünig, Bianca, and Fenella Fleischmann. 2015. "Understanding the Veiling of Muslim Women in the Netherlands." *Journal for the Scientific Study of Religion* 54 (1): 20–37. <https://doi.org/10.1111/jssr.12166>.

- Buckley, David T., and Luis Felipe Mantilla. 2013. "God and Governance: Development, State Capacity, and the Regulation of Religion." *Journal for the Scientific Study of Religion* 52 (2): 328–48. <https://doi.org/10.1111/jssr.12025>.
- Burdette, Amy M., Terrence D. Hill, Noah S. Webb, Jason A. Ford, and Stacy H. Haynes. 2018. "Religious Involvement and Substance Use Among Urban Mothers." *Journal for the Scientific Study of Religion* 57 (1): 156–72. <https://doi.org/10.1111/jssr.12501>.
- Burge, Ryan P., and Paul A. Djupe. 2014. "Truly Inclusive or Uniformly Liberal? An Analysis of the Politics of the Emerging Church." *Journal for the Scientific Study of Religion* 53 (3): 636–51. <https://doi.org/10.1111/jssr.12129>.
- . 2017. "An Emergent Threat: Christian Clergy Perceptions of the Emerging Church Movement." *Journal for the Scientific Study of Religion* 56 (1): 26–32. <https://doi.org/10.1111/jssr.12324>.
- Burke, Kelsy, and Amy Moff Hudec. 2015. "Sexual Encounters and Manhood Acts: Evangelicals, Latter-Day Saints, and Religious Masculinities." *Journal for the Scientific Study of Religion* 54 (2): 330–44. <https://doi.org/10.1111/jssr.12182>.
- Burkimsheer, Marion. 2014. "Is Religious Attendance Bottoming Out? An Examination of Current Trends Across Europe." *Journal for the Scientific Study of Religion* 53 (2): 432–45. <https://doi.org/10.1111/jssr.12111>.
- Cadge, Wendy, Mar Grier, Kristen Lucken, and Ines Michalowski. 2017. "Religion in Public Institutions: Comparative Perspectives from the United States, the United Kingdom, and Europe." *Journal for the Scientific Study of Religion* 56 (2): 226–33. <https://doi.org/10.1111/jssr.12350>.
- Cadge, Wendy, Peggy Levitt, and David Smilde. 2011. "De-Centering and Re-Centering: Rethinking Concepts and Methods in the Sociological Study of Religion." *Journal for the Scientific Study of Religion* 50 (3): 437–49. <https://doi.org/10.1111/j.1468-5906.2011.01585.x>.
- Cadge, Wendy, and Emily Sigalow. 2013. "Negotiating Religious Differences: The Strategies of Interfaith Chaplains in Healthcare." *Journal for the Scientific Study of Religion* 52 (1): 146–58. <https://doi.org/10.1111/jssr.12008>.
- Cadge, Wendy, Katherine Wang, and Mary Rowe. 2019. "Perspectives from the Edge: Chaplains in Greater Boston, 1945–2015." *Journal for the Scientific Study of Religion* 58 (1): 269–86. <https://doi.org/10.1111/jssr.12582>.
- Calfano, Brian R., and Elizabeth A. Oldmixon. 2018. "The Influence of Institutional Salience on Political Attitudes and Activism among Catholic Priests in the United States." *Journal for the Scientific Study of Religion* 57 (3): 634–43. <https://doi.org/10.1111/jssr.12540>.
- Calvillo, Jonathan E., and Stanley R. Bailey. 2015. "Latino Religious Affiliation and Ethnic Identity." *Journal for the Scientific Study of Religion* 54 (1): 57–78. <https://doi.org/10.1111/jssr.12164>.
- Castle, Jeremiah J. 2015. "The Electoral Impact of Public Opinion on Religious Establishment." *Journal for the Scientific Study of Religion* 54 (4): 814–32. <https://doi.org/10.1111/jssr.12228>.
- Castle, Jeremiah J., Geoffrey C. Layman, David E. Campbell, and John C. Green. 2017. "Survey Experiments on Candidate Religiosity, Political Attitudes, and Vote Choice." *Journal for the Scientific Study of Religion* 56 (1): 143–61. <https://doi.org/10.1111/jssr.12311>.
- Chan, Esther, and Elaine Howard Ecklund. 2016. "Narrating and Navigating Authorities: Evangelical and Mainline Protestant Interpretations of the Bible and Science." *Journal for the Scientific Study of Religion* 55 (1): 54–69. <https://doi.org/10.1111/jssr.12245>.
- Chapp, Christopher B., and Kevin Coe. 2019. "Religion in American Presidential Campaigns, 1952–2016: Applying a New Framework for Understanding Candidate Communication." *Journal for the Scientific Study of Religion* 58 (2): 398–414. <https://doi.org/10.1111/jssr.12590>.
- Chaves, Mark, and Shawna L. Anderson. 2014. "Changing American Congregations: Findings from the Third Wave of the National Congregations Study." *Journal for the Scientific Study of Religion* 53 (4): 676–86. <https://doi.org/10.1111/jssr.12151>.
- Chen, Carolyn, and Jerry Z. Park. 2019. "Pathways of Religious Assimilation: Second-Generation Asian Americans' Religious Retention and Religiosity." *Journal for the Scientific Study of Religion* 58 (3): 666–88. <https://doi.org/10.1111/jssr.12612>.
- Chen, Tongzhou, Michael McBride, and Martin B. Short. 2019. "Dynamics of Religious Group Growth and Survival." *Journal for the Scientific Study of Religion* 58 (1): 67–92. <https://doi.org/10.1111/jssr.12569>.
- Chen, Zhuo, Ralph W. Hood Jr, Lijun Yang, and P. J. Watson. 2011. "Mystical Experience Among Tibetan Buddhists: The Common Core Thesis Revisited." *Journal for the Scientific Study of Religion* 50 (2): 328–38. <https://doi.org/10.1111/j.1468-5906.2011.01570.x>.

- Chen, Zhuo, Wen Qi, Ralph W. Hood, and P. J. Watson. 2011. "Common Core Thesis and Qualitative and Quantitative Analysis of Mysticism in Chinese Buddhist Monks and Nuns." *Journal for the Scientific Study of Religion* 50 (4): 654–70. <https://doi.org/10.1111/j.1468-5906.2011.01606.x>.
- Childs, Ellen. 2010. "Religious Attendance and Happiness: Examining Gaps in the Current Literature—A Research Note." *Journal for the Scientific Study of Religion* 49 (3): 550–60. <https://doi.org/10.1111/j.1468-5906.2010.01528.x>.
- Choi, Mihwa. 2012. "Extreme Asceticism: Confucian Practice and Riesebrodt's Religious Virtuoso." *Journal for the Scientific Study of Religion* 51 (3): 456–67. <https://doi.org/10.1111/j.1468-5906.2012.01665.x>.
- Ciarrochi, Joseph, and Patrick C. L. Heaven. 2012. "Religious Values and the Development of Trait Hope and Self-Esteem in Adolescents." *Journal for the Scientific Study of Religion* 51 (4): 676–88. <https://doi.org/10.1111/j.1468-5906.2012.01675.x>.
- Clark, Travis Daryl, Richard C. Grove, Heather K. Terrell, and Casey Swanson. 2020. "Diverging Perceptions of Personal Moral Values and the Values of One's Religious Group." *Journal for the Scientific Study of Religion* 59 (1): 119–40. <https://doi.org/10.1111/jssr.12644>.
- Clements, John M., Chenyang Xiao, and Aaron M. McCright. 2014. "An Examination of the 'Greening of Christianity' Thesis Among Americans, 1993–2010." *Journal for the Scientific Study of Religion* 53 (2): 373–91. <https://doi.org/10.1111/jssr.12116>.
- Coates, Dominiek. 2013. "The Effect of New Religious Movement Affiliation and Disaffiliation on Reflexivity and Sense of Self." *Journal for the Scientific Study of Religion* 52 (4): 793–809. <https://doi.org/10.1111/jssr.12069>.
- Connor, Phillip. 2012. "International Migration and Religious Selection." *Journal for the Scientific Study of Religion* 51 (1): 184–94. <https://doi.org/10.1111/j.1468-5906.2011.01631.x>.
- Conway, Brian, and Bram Spruyt. 2018. "Catholic Commitment Around the Globe: A 52-Country Analysis." *Journal for the Scientific Study of Religion* 57 (2): 276–99. <https://doi.org/10.1111/jssr.12512>.
- Cook, Kaye V., Cynthia N. Kimball, Kathleen C. Leonard, and Chris J. Boyatzis. 2014. "The Complexity of Quest in Emerging Adults' Religiosity, Well-Being, and Identity." *Journal for the Scientific Study of Religion* 53 (1): 73–89. <https://doi.org/10.1111/jssr.12086>.
- Cooper, Travis Warren. 2017. "Emerging, Emergent, Emergence: Boundary Maintenance, Definition Construction, and Legitimation Strategies in the Establishment of a Post-Evangelical Subculture." *Journal for the Scientific Study of Religion* 56 (2): 398–417. <https://doi.org/10.1111/jssr.12329>.
- Corcoran, Katie E., David Pettinicchio, and Blaine Robbins. 2012. "Religion and the Acceptability of White-Collar Crime: A Cross-National Analysis." *Journal for the Scientific Study of Religion* 51 (3): 542–67. <https://doi.org/10.1111/j.1468-5906.2012.01669.x>.
- Cragun, Ryan T., Emily Williams, and J. E. Sumerau. 2015. "From Sodomy to Sympathy: LDS Elites' Discursive Construction of Homosexuality Over Time." *Journal for the Scientific Study of Religion* 54 (2): 291–310. <https://doi.org/10.1111/jssr.12180>.
- Cranney, Stephen. 2013. "Do People Who Believe in God Report More Meaning in Their Lives? The Existential Effects of Belief." *Journal for the Scientific Study of Religion* 52 (3): 638–46. <https://doi.org/10.1111/jssr.12046>.
- . 2017. "Why Did God Make Me This Way? Religious Coping and Framing in the Virtuous Pedophile Community." *Journal for the Scientific Study of Religion* 56 (4): 852–68. <https://doi.org/10.1111/jssr.12480>.
- Curtis, K. Amber, and Laura R. Olson. 2019. "Identification with Religion: Cross-National Evidence from a Social Psychological Perspective." *Journal for the Scientific Study of Religion* 58 (4): 790–812. <https://doi.org/10.1111/jssr.12634>.
- Danielsen, Sabrina. 2013. "Fracturing Over Creation Care? Shifting Environmental Beliefs Among Evangelicals, 1984–2010." *Journal for the Scientific Study of Religion* 52 (1): 198–215. <https://doi.org/10.1111/jssr.12017>.
- Davis, Joshua. 2018. "Enforcing Christian Nationalism: Examining the Link Between Group Identity and Punitive Attitudes in the United States." *Journal for the Scientific Study of Religion* 57 (2): 300–317. <https://doi.org/10.1111/jssr.12510>.
- Davis, Nicholas T., and Christopher M. Federico. 2019. "Constructing Images of the Divine: Latent Heterogeneity in Americans' Impressions of God." *Journal for the Scientific Study of Religion* 58 (1): 47–66. <https://doi.org/10.1111/jssr.12571>.
- DeAngelis, Reed T., John P. Bartkowski, and Xiaohu Xu. 2019. "Scriptural Coping: An Empirical Test of Hermeneutic Theory." *Journal for the Scientific Study of Religion* 58 (1): 174–91. <https://doi.org/10.1111/jssr.12576>.

- DeAngelis, Reed T., and Christopher G. Ellison. 2018. "Aspiration Strain and Mental Health: The Education-Contingent Role of Religion." *Journal for the Scientific Study of Religion* 57 (2): 341–64. <https://doi.org/10.1111/jssr.12520>.
- Dengah II, H. J. François. 2017. "Religion as Cultural Models: Developing an Emic Measure of Religiosity." *Journal for the Scientific Study of Religion* 56 (1): 104–25. <https://doi.org/10.1111/jssr.12313>.
- Denton, Melinda Lundquist. 2012. "Family Structure, Family Disruption, and Profiles of Adolescent Religiosity." *Journal for the Scientific Study of Religion* 51 (1): 42–64. <https://doi.org/10.1111/j.1468-5906.2011.01619.x>.
- Dezutter, Jessie, Linda A. Robertson, Koen Luyckx, and Dirk Hutsebaut. 2010. "Life Satisfaction in Chronic Pain Patients: The Stress-Buffering Role of the Centrality of Religion." *Journal for the Scientific Study of Religion* 49 (3): 507–16. <https://doi.org/10.1111/j.1468-5906.2010.01525.x>.
- Dillon, Michele. 2014. "Asynchrony in Attitudes Toward Abortion and Gay Rights: The Challenge to Values Alignment." *Journal for the Scientific Study of Religion* 53 (1): 1–16. <https://doi.org/10.1111/jssr.12096>.
- Dingemans, Ellen, and Erik Van Ingen. 2015. "Does Religion Breed Trust? A Cross-National Study of the Effects of Religious Involvement, Religious Faith, and Religious Context on Social Trust." *Journal for the Scientific Study of Religion* 54 (4): 739–55. <https://doi.org/10.1111/jssr.12217>.
- Djupe, Paul A. 2014. "The Effects of Descriptive Associational Leadership on Civic Engagement: The Case of Clergy and Gender in Protestant Denominations." *Journal for the Scientific Study of Religion* 53 (3): 497–514. <https://doi.org/10.1111/jssr.12133>.
- Djupe, Paul A., and Brian R. Calfano. 2012. "The Deliberative Pulpit? The Democratic Norms and Practices of the PCUSA." *Journal for the Scientific Study of Religion* 51 (1): 90–109. <https://doi.org/10.1111/j.1468-5906.2011.01623.x>.
- Djupe, Paul A., and Gregory W. Gwiasda. 2010. "Evangelizing the Environment: Decision Process Effects in Political Persuasion." *Journal for the Scientific Study of Religion* 49 (1): 73–86. <https://doi.org/10.1111/j.1468-5906.2009.01493.x>.
- Doebler, Stefanie, and Ian Shuttleworth. 2018. "Religious Identification, Switching, and Apostasy Among Protestants and Catholics in Northern Ireland: Individual and Cohort Dynamics Between Two Censuses 2001–2011." *Journal for the Scientific Study of Religion* 57 (4): 723–42. <https://doi.org/10.1111/jssr.12554>.
- Dollhopf, Erica J. 2013. "Decline and Conflict: Causes and Consequences of Leadership Transitions in Religious Congregations." *Journal for the Scientific Study of Religion* 52 (4): 675–97. <https://doi.org/10.1111/jssr.12075>.
- Dollhopf, Erica J., Christopher P. Scheitle, and John D. McCarthy. 2015. "Initial Results from a Survey of Two Cohorts of Religious Nonprofits." *Journal for the Scientific Study of Religion* 54 (1): 156–65. <https://doi.org/10.1111/jssr.12165>.
- Dougherty, Kevin D., and Michael O. Emerson. 2018. "The Changing Complexion of American Congregations." *Journal for the Scientific Study of Religion* 57 (1): 24–38. <https://doi.org/10.1111/jssr.12495>.
- Dougherty, Kevin D., Jenna Griebel, Mitchell J. Neubert, and Jerry Z. Park. 2013. "A Religious Profile of American Entrepreneurs." *Journal for the Scientific Study of Religion* 52 (2): 401–9. <https://doi.org/10.1111/jssr.12026>.
- Dougherty, Kevin D., Brandon C. Martinez, and Gerardo Martí. 2015. "Congregational Diversity and Attendance in a Mainline Protestant Denomination." *Journal for the Scientific Study of Religion* 54 (4): 668–83. <https://doi.org/10.1111/jssr.12229>.
- Dougherty, Kevin D., Mitchell J. Neubert, and Jerry Z. Park. 2019. "Prosperity Beliefs and Value Orientations: Fueling or Suppressing Entrepreneurial Activity." *Journal for the Scientific Study of Religion* 58 (2): 475–93. <https://doi.org/10.1111/jssr.12598>.
- Dowd, Robert, and Ani Sarkissian. 2017. "The Roman Catholic Charismatic Movement and Civic Engagement in Sub-Saharan Africa." *Journal for the Scientific Study of Religion* 56 (3): 536–57. <https://doi.org/10.1111/jssr.12370>.
- Draper, Scott. 2014. "Effervescence and Solidarity in Religious Organizations." *Journal for the Scientific Study of Religion* 53 (2): 229–48.
- Drydak, Nick. 2010. "Religious Affiliation and Employment Bias in the Labor Market." *Journal for the Scientific Study of Religion* 49 (3): 477–93. <https://doi.org/10.1111/j.1468-5906.2010.01523.x>.
- Duke, Aaron A., and Peter R. Giancola. 2013. "Alcohol Reverses Religion's Prosocial Influence on Aggression." *Journal for the Scientific Study of Religion* 52 (2): 279–92. <https://doi.org/10.1111/jssr.12029>.
- Eagle, David. 2011. "The Loosening Bond of Religion on Canadian Society: Reply to Bibby." *Journal for the Scientific Study of Religion* 50 (4): 838–39. [https://doi.org/10.1111/j.1468-5906.2011.01596\\_2.x](https://doi.org/10.1111/j.1468-5906.2011.01596_2.x).

- Eagle, David E. 2011. "Changing Patterns of Attendance at Religious Services in Canada, 1986–2008." *Journal for the Scientific Study of Religion* 50 (1): 187–200. <https://doi.org/10.1111/j.1468-5906.2010.01559.x>.
- Ecklund, Elaine Howard. 2020. "Diversifying the Social Scientific Study of Religion: The Next 70 Years." *Journal for the Scientific Study of Religion* 59 (1): 5–17. <https://doi.org/10.1111/jssr.12647>.
- Ecklund, Elaine Howard, and Kristen Schultz Lee. 2011. "Atheists and Agnostics Negotiate Religion and Family." *Journal for the Scientific Study of Religion* 50 (4): 728–43. <https://doi.org/10.1111/j.1468-5906.2011.01604.x>.
- Ecklund, Elaine Howard, Jerry Z. Park, and Katherine L. Sorrell. 2011. "Scientists Negotiate Boundaries Between Religion and Science." *Journal for the Scientific Study of Religion* 50 (3): 552–69. <https://doi.org/10.1111/j.1468-5906.2011.01586.x>.
- Ecklund, Elaine Howard, Christopher P. Scheitle, and Jared Peifer. 2018. "The Religiosity of Academic Scientists in the United Kingdom: Assessing the Role of Discipline and Department Status." *Journal for the Scientific Study of Religion* 57 (4): 743–57. <https://doi.org/10.1111/jssr.12552>.
- Edgell, Penny, and Derek Robey. 2015. "Loose Connections and Liberal Theology: Blurring the Boundaries in Two Church-Based Communities of Spiritual Practice." *Journal for the Scientific Study of Religion* 54 (4): 649–67. <https://doi.org/10.1111/jssr.12236>.
- Edgell, Penny, Eric P. Tranby, and Darin M. Mather. 2013. "Profiles of Anticipated Support: Religion's Place in the Composition of Americans' Emotional Support Networks." *Journal for the Scientific Study of Religion* 52 (2): 293–308. <https://doi.org/10.1111/jssr.12021>.
- Edwards, Korie L. 2016. "The Space Between: Exploring How Religious Leaders Reconcile Religion and Politics." *Journal for the Scientific Study of Religion* 55 (2): 271–87. <https://doi.org/10.1111/jssr.12256>.
- Eitle, David. 2011. "Religion and Gambling Among Young Adults in the United States: Moral Communities and the Deterrence Hypothesis." *Journal for the Scientific Study of Religion* 50 (1): 61–81. <https://doi.org/10.1111/j.1468-5906.2010.01552.x>.
- Ellingson, Stephen, Vernon A. Woodley, and Anthony Paik. 2012. "The Structure of Religious Environmentalism: Movement Organizations, Interorganizational Networks, and Collective Action." *Journal for the Scientific Study of Religion* 51 (2): 266–85. <https://doi.org/10.1111/j.1468-5906.2012.01639.x>.
- Ellis, Lee, Anthony W. Hoskin, and Malini Ratnasingam. 2016. "Testosterone, Risk Taking, and Religiosity: Evidence from Two Cultures." *Journal for the Scientific Study of Religion* 55 (1): 153–73. <https://doi.org/10.1111/jssr.12248>.
- Ellis, Rachel. 2015. "Outreach and Exclusion: Jewish Denominational Marketing in the Early 20th Century." *Journal for the Scientific Study of Religion* 54 (1): 38–56. <https://doi.org/10.1111/jssr.12167>.
- . 2017. "Silent Disagreement: Microinteractional Solutions to Moral Dissent Among Catholic Converts." *Journal for the Scientific Study of Religion* 56 (2): 383–97. <https://doi.org/10.1111/jssr.12332>.
- Ellison, Christopher G., Reed T. Deangelis, Terrence D. Hill, and Paul Froese. 2019. "Sleep Quality and the Stress-Buffering Role of Religious Involvement: A Mediated Moderation Analysis." *Journal for the Scientific Study of Religion* 58 (1): 251–68. <https://doi.org/10.1111/jssr.12581>.
- Ellison, Christopher G., and Michael J. McFarland. 2011. "Religion and Gambling Among U.S. Adults: Exploring the Role of Traditions, Beliefs, Practices, and Networks\*." *Journal for the Scientific Study of Religion* 50 (1): 82–102. <https://doi.org/10.1111/j.1468-5906.2010.01553.x>.
- Emerson, Michael O., David Sikkink, and Adele D. James. 2010. "The Panel Study on American Religion and Ethnicity: Background, Methods, and Selected Results." *Journal for the Scientific Study of Religion* 49 (1): 162–71. <https://doi.org/10.1111/j.1468-5906.2009.01498.x>.
- Engelberg, Ari. 2016a. "Religious Zionist Singles: Caught Between 'Family Values' and 'Young Adulthood.'" *Journal for the Scientific Study of Religion* 55 (2): 349–64. <https://doi.org/10.1111/jssr.12259>.
- . 2016b. "Update: Singles in Late-Modern Conservative Religions." *Journal for the Scientific Study of Religion* 55 (3): 652–55. <https://doi.org/10.1111/jssr.12290>.
- Erickson, Lance D., and James W. Phillips. 2012. "The Effect of Religious-Based Mentoring on Educational Attainment: More than Just a Spiritual High?" *Journal for the Scientific Study of Religion* 51 (3): 568–87. <https://doi.org/10.1111/j.1468-5906.2012.01661.x>.
- Escher, Daniel. 2013. "How Does Religion Promote Forgiveness? Linking Beliefs, Orientations, and Practices." *Journal for the Scientific Study of Religion* 52 (1): 100–119. <https://doi.org/10.1111/jssr.12012>.

- Evans, Geoffrey, and Ksenia Northmore-Ball. 2012. "The Limits of Secularization? The Resurgence of Orthodoxy in Post-Soviet Russia." *Journal for the Scientific Study of Religion* 51 (4): 795–808. <https://doi.org/10.1111/j.1468-5906.2012.01684.x>.
- Evans, John H. 2011. "Epistemological and Moral Conflict Between Religion and Science." *Journal for the Scientific Study of Religion* 50 (4): 707–27. <https://doi.org/10.1111/j.1468-5906.2011.01603.x>.
- — —. 2013. "The Growing Social and Moral Conflict Between Conservative Protestantism and Science." *Journal for the Scientific Study of Religion* 52 (2): 368–85. <https://doi.org/10.1111/jssr.12022>.
- — —. 2017. "Aversion to and Understanding of God Talk in the Public Sphere: A Survey Experiment." *Journal for the Scientific Study of Religion* 56 (3): 459–80. <https://doi.org/10.1111/jssr.12368>.
- Evans, Michael S. 2014. "Religion and Political Decision Making." *Journal for the Scientific Study of Religion* 53 (1): 145–63. <https://doi.org/10.1111/jssr.12088>.
- Evans, Van, Daniel W. Curtis, and Ram A. Cnaan. 2013. "Volunteering Among Latter-Day Saints." *Journal for the Scientific Study of Religion* 52 (4): 827–41. <https://doi.org/10.1111/jssr.12074>.
- Everton, Sean F., and Robert Schroeder. 2019. "Plagues, Pagans, and Christians: Differential Survival, Social Networks, and the Rise of Christianity." *Journal for the Scientific Study of Religion* 58 (4): 775–89. <https://doi.org/10.1111/jssr.12631>.
- Faranda, Regina D., and David B. Nolle. 2019. "The Mosaic of Muslim Religiosity and Social-Political Attitudes in Kyrgyzstan: A Gender-Based Exploration." *Journal for the Scientific Study of Religion* 58 (1): 114–37. <https://doi.org/10.1111/jssr.12573>.
- Farrell, Justin. 2011. "The Young and the Restless? The Liberalization of Young Evangelicals." *Journal for the Scientific Study of Religion* 50 (3): 517–32. <https://doi.org/10.1111/j.1468-5906.2011.01589.x>.
- Feldman, David B., Ian C. Fischer, and Robert A. Gressis. 2016. "Does Religious Belief Matter for Grief and Death Anxiety? Experimental Philosophy Meets Psychology of Religion." *Journal for the Scientific Study of Religion* 55 (3): 531–39. <https://doi.org/10.1111/jssr.12288>.
- Finke, Roger, and Robert R. Martin. 2014. "Ensuring Liberties: Understanding State Restrictions on Religious Freedoms." *Journal for the Scientific Study of Religion* 53 (4): 687–705. <https://doi.org/10.1111/jssr.12148>.
- Finke, Roger, Dane R. Mataic, and Jonathan Fox. 2017. "Assessing the Impact of Religious Registration." *Journal for the Scientific Study of Religion* 56 (4): 720–36. <https://doi.org/10.1111/jssr.12485>.
- Fishman, Robert M., Carlos Gervasoni, and Keely Jones Stater. 2015. "Inequality and the Altruistic Life: A Study of the Priestly Vocation Rate." *Journal for the Scientific Study of Religion* 54 (3): 575–95. <https://doi.org/10.1111/jssr.12216>.
- Flores, Edward Orozco, and Jennifer Elena Cossyleon. 2016. "'I Went Through It so You Don't Have To': Faith-Based Community Organizing for the Formerly Incarcerated." *Journal for the Scientific Study of Religion* 55 (4): 662–76. <https://doi.org/10.1111/jssr.12294>.
- Fox, Nicole. 2012. "'God Must Have Been Sleeping': Faith as an Obstacle and a Resource for Rwandan Genocide Survivors in the United States." *Journal for the Scientific Study of Religion* 51 (1): 65–78. <https://doi.org/10.1111/j.1468-5906.2011.01624.x>.
- Franzen, Aaron B. 2016. "Is This Relevant? Physician Perceptions, Clinical Relevance, and Religious Content in Clinical Interactions." *Journal for the Scientific Study of Religion* 55 (3): 438–64. <https://doi.org/10.1111/jssr.12289>.
- Frost, Jacqui, and Penny Edgell. 2017. "Distinctiveness Reconsidered: Religiosity, Structural Location, and Understandings of Racial Inequality." *Journal for the Scientific Study of Religion* 56 (2): 277–301. <https://doi.org/10.1111/jssr.12334>.
- Fuist, Todd Nicholas. 2015. "Talking to God Among a Cloud of Witnesses: Collective Prayer as a Meaningful Performance." *Progressive Religion* 54 (3). <https://doi.org/10.1111/jssr.12209>.
- — —. 2016. "'It Just Always Seemed Like It Wasn't a Big Deal, Yet I Know for Some People They Really Struggle with It': LGBT Religious Identities in Context." *Journal for the Scientific Study of Religion* 55 (4): 770–86. <https://doi.org/10.1111/jssr.12291>.
- Fulton, Brad R. 2011. "Black Churches and HIV/AIDS: Factors Influencing Congregations' Responsiveness to Social Issues." *Journal for the Scientific Study of Religion* 50 (3): 617–30. <https://doi.org/10.1111/j.1468-5906.2011.01579.x>.

- García, Alfredo, and Joseph Blankholm. 2016. "The Social Context of Organized Nonbelief: County-Level Predictors of Nonbeliever Organizations in the United States." *Journal for the Scientific Study of Religion* 55 (1): 70–90. <https://doi.org/10.1111/jssr.12250>.
- Garcia, Ginny E., John P. Bartkowski, and Xiaohe Xu. 2017. "Religion and Infant Mortality in the United States: A Community-Level Investigation of Denominational Variations in Postneonatal Deaths." *Journal for the Scientific Study of Religion* 56 (4): 886–95. <https://doi.org/10.1111/jssr.12487>.
- Garfield, Andrew M., Brian B. Drwecki, Colleen F. Moore, Katherine V. Kortenkamp, and Matthew D. Gracz. 2014. "The Oneness Beliefs Scale: Connecting Spirituality with Pro-Environmental Behavior." *Journal for the Scientific Study of Religion* 53 (2): 356–72. <https://doi.org/10.1111/jssr.12108>.
- Garroutte, Eva Marie, Janette Beals, Heather Orton Anderson, Jeffrey A. Henderson, Patricia Nez-Henderson, Jacob Thomas, Calvin Croy, Spero M. Manson, and The AI-SUPERPPF Team. 2014. "Religio-Spiritual Participation in Two American Indian Populations." *Journal for the Scientific Study of Religion* 53 (1): 17–37. <https://doi.org/10.1111/jssr.12084>.
- Ghorbani, Nima, P. J. Watson, Zoha Saeedi, Zhuo Chen, and Christopher F. Silver. 2012. "Religious Problem Solving and the Complexity of Religious Rationality Within an Iranian Muslim Ideological Surround." *Journal for the Scientific Study of Religion* 51 (4): 656–75. <https://doi.org/10.1111/j.1468-5906.2012.01686.x>.
- Glendinning, Tony, and Steve Bruce. 2011. "Privatization or Deprivatization: British Attitudes About the Public Presence of Religion." *Journal for the Scientific Study of Religion* 50 (3): 503–16. <https://doi.org/10.1111/j.1468-5906.2011.01582.x>.
- González, Alessandra L. 2011. "Measuring Religiosity in a Majority Muslim Context: Gender, Religious Salience, and Religious Experience Among Kuwaiti College Students—A Research Note." *Journal for the Scientific Study of Religion* 50 (2): 339–50. <https://doi.org/10.1111/j.1468-5906.2011.01571.x>.
- Grant, Don, Jeff Sallaz, and Cindy Cain. 2016. "Bridging Science and Religion: How Health-Care Workers as Storytellers Construct Spiritual Meanings." *Journal for the Scientific Study of Religion* 55 (3): 465–84. <https://doi.org/10.1111/jssr.12285>.
- Gries, Peter, Jenny Su, and David Schak. 2012. "Toward the Scientific Study of Polytheism: Beyond Forced-Choice Measures of Religious Belief." *Journal for the Scientific Study of Religion* 51 (4): 623–37. <https://doi.org/10.1111/j.1468-5906.2012.01683.x>.
- Grove, Richard C., Deborah L. Hall, Ayla Rubenstein, and Heather K. Terrell. 2019. "Post-Critical Belief Scale and Scripture as Predictors of Prejudice." *Journal for the Scientific Study of Religion* 58 (2): 526–36. <https://doi.org/10.1111/jssr.12594>.
- Guest, Mathew. 2017. "The Emerging Church in Transatlantic Perspective." *Journal for the Scientific Study of Religion* 56 (1): 41–51. <https://doi.org/10.1111/jssr.12326>.
- Gurses, Mehmet, and Ahmet Erdi Ozturk. 2020. "Religion and Armed Conflict: Evidence from the Kurdish Conflict in Turkey." *Journal for the Scientific Study of Religion* First published online. <https://doi.org/10.1111/jssr.12652>.
- Hackett, Conrad, Philip Schwadel, Gregory A. Smith, Elizabeth Podrebarac Sciupac, and Claire Gecewicz. 2018. "Choose the Method for Aggregating Religious Identities That Is Most Appropriate for Your Research." *Journal for the Scientific Study of Religion* 57 (4): 807–16. <https://doi.org/10.1111/jssr.12555>.
- Hackett, Conrad, Gregory A. Smith, Elizabeth Podrebarac Sciupac, and Claire Gecewicz. 2018. "Supporting Evidence: Why Social Scientists Should Sometimes Consider Data Other than the General Social Survey." *Journal for the Scientific Study of Religion* 57 (4): 854–57. <https://doi.org/10.1111/jssr.12570>.
- Hadnes, Myriam, and Heiner Schumacher. 2012. "The Gods Are Watching: An Experimental Study of Religion and Traditional Belief in Burkina Faso." *Journal for the Scientific Study of Religion* 51 (4): 689–704. <https://doi.org/10.1111/j.1468-5906.2012.01676.x>.
- Hagen, Timothy, Martie P. Thompson, and Janelle Williams. 2018. "Religiosity Reduces Sexual Aggression and Coercion in a Longitudinal Cohort of College Men: Mediating Roles of Peer Norms, Promiscuity, and Pornography." *Journal for the Scientific Study of Religion* 57 (1): 95–108. <https://doi.org/10.1111/jssr.12496>.
- Hartman, Harriet, and Moshe Hartman. 2011. "Jewish Identity and the Secular Achievements of American Jewish Men and Women." *Journal for the Scientific Study of Religion* 50 (1): 133–53. <https://doi.org/10.1111/j.1468-5906.2010.01556.x>.
- Harvey, Peter Francis. 2018. "It's a Total Way of Life? Catholic Priests, Women's Ordination, and Identity Work." *Journal for the Scientific Study of Religion* 57 (3): 547–66. <https://doi.org/10.1111/jssr.12530>.



- Hayford, Sarah R., and Jenny Trinitapoli. 2011. "Religious Differences in Female Genital Cutting: A Case Study from Burkina Faso." *Journal for the Scientific Study of Religion* 50 (2): 252–71. <https://doi.org/10.1111/j.1468-5906.2011.01566.x>.
- Hayward, George M. 2019. "Religiosity and Premarital Sexual Behaviors Among Adolescents: An Analysis of Functional Form." *Journal for the Scientific Study of Religion* 58 (2): 439–58. <https://doi.org/10.1111/jssr.12588>.
- Hayward, R. David, and Neal Krause. 2013. "Patterns of Change in Prayer Activity, Expectancies, and Contents During Older Adulthood." *Journal for the Scientific Study of Religion* 52 (1): 17–34. <https://doi.org/10.1111/jssr.12014>.
- Hempel, Lynn M., Todd Matthews, and John Bartkowski. 2012. "Trust in a 'Fallen World': The Case of Protestant Theological Conservatism." *Journal for the Scientific Study of Religion* 51 (3): 522–41. <https://doi.org/10.1111/j.1468-5906.2012.01662.x>.
- Henderson, Andrea K. 2016. "The Long Arm of Religion: Childhood Adversity, Religion, and Self-Perception Among Black Americans." *Journal for the Scientific Study of Religion* 55 (2): 324–48. <https://doi.org/10.1111/jssr.12262>.
- Hermann, Anthony D., Austin J. Simpson, Mark J. Lehtman, and Robert C. Fuller. 2015. "Does Guilt Motivate Prayer?" *Journal for the Scientific Study of Religion* 54 (3): 540–54. <https://doi.org/10.1111/jssr.12208>.
- Hill, Eric D., Adam B. Cohen, Heather K. Terrell, and Craig T. Nagoshi. 2010. "The Role of Social Cognition in the Religious Fundamentalism-Prejudice Relationship." *Journal for the Scientific Study of Religion* 49 (4): 724–39. <https://doi.org/10.1111/j.1468-5906.2010.01542.x>.
- Hill, Jonathan P. 2011. "Faith and Understanding: Specifying the Impact of Higher Education on Religious Belief." *Journal for the Scientific Study of Religion* 50 (3): 533–51. <https://doi.org/10.1111/j.1468-5906.2011.01587.x>.
- . 2014. "Rejecting Evolution: The Role of Religion, Education, and Social Networks." *Journal for the Scientific Study of Religion* 53 (3): 575–94. <https://doi.org/10.1111/jssr.12127>.
- Hill, Jonathan P., and Kevin R. den Dulk. 2013. "Religion, Volunteering, and Educational Setting: The Effect of Youth Schooling Type on Civic Engagement." *Journal for the Scientific Study of Religion* 52 (1): 179–97. <https://doi.org/10.1111/jssr.12011>.
- Hirschle, Jochen. 2010a. "Reply to Voas: Religious Values: Explanatory or Dependent Variables?" *Journal for the Scientific Study of Religion* 49 (4): 691–693.
- . 2010b. "From Religious to Consumption-Related Routine Activities? Analyzing Ireland's Economic Boom and the Decline in Church Attendance." *Journal for the Scientific Study of Religion* 49 (4): 673–87. <https://doi.org/10.1111/j.1468-5906.2010.01536.x>.
- . 2010c. "Religious Values: Explanatory or Dependent Variables?" *Journal for the Scientific Study of Religion* 49 (4): 691–93. <https://doi.org/10.1111/j.1468-5906.2010.01538.x>.
- . 2013. "'Secularization of Consciousness' or Alternative Opportunities? The Impact of Economic Growth on Religious Belief and Practice in 13 European Countries." *Journal for the Scientific Study of Religion* 52 (2): 410–24. <https://doi.org/10.1111/jssr.12030>.
- Hoffmann, John P. 2019. "Risk Preference Theory and Gender Differences in Religiousness: A Replication and Extension." *Journal for the Scientific Study of Religion* 58 (1): 210–30. <https://doi.org/10.1111/jssr.12578>.
- Hout, Michael. 2017. "Religious Ambivalence, Liminality, and the Increase of No Religious Preference in the United States, 2006–2014." *Journal for the Scientific Study of Religion* 56 (1): 52–63. <https://doi.org/10.1111/jssr.12314>.
- Hoverd, William James, Quentin D. Atkinson, and Chris G. Sibley. 2012. "Group Size and the Trajectory of Religious Identification." *Journal for the Scientific Study of Religion* 51 (2): 286–303. <https://doi.org/10.1111/j.1468-5906.2012.01643.x>.
- Hu, Anning, and Reid J. Leamaster. 2015. "Intergenerational Religious Mobility in Contemporary China." *Journal for the Scientific Study of Religion* 54 (1): 79–99. <https://doi.org/10.1111/jssr.12168>.
- Hu, Anning, Xiaozhao Yousef Yang, and Weixiang Luo. 2017. "Christian Identification and Self-Reported Depression: Evidence from China." *Journal for the Scientific Study of Religion* 56 (4): 765–80. <https://doi.org/10.1111/jssr.12482>.
- Huang, Ke-hsien. 2014. "Dyadic Nexus Fighting Two-Front Battles: A Study of the Microlevel Process of the Official-Religion-State Relationship in China." *Journal for the Scientific Study of Religion* 53 (4): 706–21. <https://doi.org/10.1111/jssr.12149>.
- . 2016. "Sect-to-Church Movement in Globalization: Transforming Pentecostalism and Coastal Intermediaries in Contemporary China." *Journal for the Scientific Study of Religion* 55 (2): 407–16. <https://doi.org/10.1111/jssr.12257>.

- Huuskes, Lee M., Patrick C. L. Heaven, Joseph Ciarrochi, Philip Parker, and Nerina Caltabiano. 2016. "Is Belief in God Related to Differences in Adolescents' Psychological Functioning?" *Journal for the Scientific Study of Religion* 55 (1): 40–53. <https://doi.org/10.1111/jssr.12249>.
- Idler, Ellen, and Allan Kellehear. 2017. "Religion in Public Health-Care Institutions: U.S. and U.K. Perspectives." *Journal for the Scientific Study of Religion* 56 (2): 234–40. <https://doi.org/10.1111/jssr.12349>.
- Idler, Ellen L., George H. Grant, Tammie Quest, Zachary Binney, and Molly M. Perkins. 2015. "Practical Matters and Ultimate Concerns, 'Doing,' and 'Being': A Diary Study of the Chaplain's Role in the Care of the Seriously Ill in an Urban Acute Care Hospital." *Journal for the Scientific Study of Religion* 54 (4): 722–38. <https://doi.org/10.1111/jssr.12235>.
- Inman, Mary, Erica Iceberg, and Laura McKeel. 2014. "Do Religious Affirmations, Religious Commitments, or General Commitments Mitigate the Negative Effects of Exposure to Thin Ideals?" *Journal for the Scientific Study of Religion* 53 (1): 38–55. <https://doi.org/10.1111/jssr.12089>.
- Irwin, Kyle, and Brandon C. Martinez. 2017. "The Effects of Protestant Theological Conservatism and Trust on Environmental Cooperation." *Journal for the Scientific Study of Religion* 56 (1): 199–212. <https://doi.org/10.1111/jssr.12312>.
- Jenkins, Kathleen E. 2010. "In Concert and Alone: Divorce and Congregational Experience." *Journal for the Scientific Study of Religion* 49 (2): 278–92. <https://doi.org/10.1111/j.1468-5906.2010.01509.x>.
- Jenkins, Kathleen E., and Gerardo Marti. 2012. "Warrior Chicks: Youthful Aging in a Postfeminist Prosperity Discourse." *Journal for the Scientific Study of Religion* 51 (2): 241–56. <https://doi.org/10.1111/j.1468-5906.2012.01651.x>.
- Jödicke, Ansgar, and Andrea Rota. 2014. "Patterns of Religious Education Policy in Switzerland: The Long Arm of Distanced Christians?" *Journal for the Scientific Study of Religion* 53 (4): 722–38. <https://doi.org/10.1111/jssr.12150>.
- Johnson, Kathryn A., Adam B. Cohen, and Morris A. Okun. 2013. "Intrinsic Religiosity and Volunteering During Emerging Adulthood: A Comparison of Mormons with Catholics and Non-Catholic Christians." *Journal for the Scientific Study of Religion* 52 (4): 842–51. <https://doi.org/10.1111/jssr.12068>.
- Johnson, Megan K., Jordan Paul Labouff, Wade C. Rowatt, Julie A. Patock-Peckham, and Robert D. Carlisle. 2012. "Facets of Right-Wing Authoritarianism Mediate the Relationship Between Religious Fundamentalism and Attitudes Toward Arabs and African Americans." *Journal for the Scientific Study of Religion* 51 (1): 128–42. <https://doi.org/10.1111/j.1468-5906.2011.01622.x>.
- Johnston, Joseph B. 2013. "Religion and Volunteering Over the Adult Life Course." *Journal for the Scientific Study of Religion* 52 (4): 733–52. <https://doi.org/10.1111/jssr.12065>.
- Jung, Jong Hyun. 2015. "Sense of Divine Involvement and Sense of Meaning in Life: Religious Tradition as a Contingency." *Journal for the Scientific Study of Religion* 54 (1): 119–33. <https://doi.org/10.1111/jssr.12170>.
- . 2020. "Belief in Supernatural Evil and Mental Health: Do Secure Attachment to God and Gender Matter?" *Journal for the Scientific Study of Religion* 59 (1): 141–60. <https://doi.org/10.1111/jssr.12645>.
- Karpov, Vyacheslav, Elena Lisovskaya, and David Barry. 2012. "Ethnodoxy: How Popular Ideologies Fuse Religious and Ethnic Identities." *Journal for the Scientific Study of Religion* 51 (4): 638–55. <https://doi.org/10.1111/j.1468-5906.2012.01678.x>.
- Kasselstrand, Isabella. 2019. "Secularity and Irreligion in Cross-National Context: A Nonlinear Approach." *Journal for the Scientific Study of Religion* 58 (3): 626–42. <https://doi.org/10.1111/jssr.12617>.
- Kastenmüller, Andreas, Tobias Greitemeyer, Amy L. Ai, Gabriele Winter, and Peter Fischer. 2011. "In the Face of Terrorism: Evidence That Belief in Literal Immortality Reduces Prejudice Under Terrorism Threat." *Journal for the Scientific Study of Religion* 50 (3): 604–16. <https://doi.org/10.1111/j.1468-5906.2011.01578.x>.
- Kent, Blake Victor, and Christopher M. Pieper. 2019. "To Know and Be Known: An Intimacy-Based Explanation for the Gender Gap in Biblical Literalism." *Journal for the Scientific Study of Religion* 58 (1): 231–50. <https://doi.org/10.1111/jssr.12580>.
- Khattab, Nabil, and Tariq Modood. 2015. "Both Ethnic and Religious: Explaining Employment Penalties Across 14 Ethno-Religious Groups in the United Kingdom." *Journal for the Scientific Study of Religion* 54 (3): 501–22. <https://doi.org/10.1111/jssr.12220>.
- Kim, Jeannie. 2015. "The Academic Advantage of Devotion: Measuring Variation in the Value of Weekly Worship in Late Adolescence on Educational Attainment Using Propensity Score Matching." *Journal for the Scientific Study of Religion* 54 (3): 555–74. <https://doi.org/10.1111/jssr.12219>.

- Kim, Jibum, Sang-Wook Kim, and Jeong-Han Kang. 2010. "Confidence in Religious Leaders in Korea: A Research Note." *Journal for the Scientific Study of Religion* 49 (2): 320–27. <https://doi.org/10.1111/j.1468-5906.2010.01512.x>.
- Kim, Seong-Hyeon, Narae Lee, and Pamela Ebstyn King. 2020. "Dimensions of Religion and Spirituality: A Longitudinal Topic Modeling Approach." *Journal for the Scientific Study of Religion* 59 (1): 62–83. <https://doi.org/10.1111/jssr.12639>.
- Kimmons, Royce, Kristin McGuire, McKell Stauffer, J. Evan Jones, Marie Gregson, and Madison Austin. 2017. "Religious Identity, Expression, and Civility in Social Media: Results of Data Mining Latter-Day Saint Twitter Accounts." *Journal for the Scientific Study of Religion* 56 (3): 637–57. <https://doi.org/10.1111/jssr.12358>.
- Kollman, Paul. 2012. "Generations of Catholics in Eastern Africa: A Practice-Centered Analysis of Religious Change." *Journal for the Scientific Study of Religion* 51 (3): 412–28. <https://doi.org/10.1111/j.1468-5906.2012.01667.x>.
- Konieczny, Mary Ellen, and Christophe Bertossi. 2017. "Religious Conflict and the Chain of Command in the American and French Militaries." *Journal for the Scientific Study of Religion* 56 (2): 248–54. <https://doi.org/10.1111/jssr.12348>.
- Konieczny, Mary Ellen, Loren D. Lybarger, and Kelly H. Chong. 2012. "Theory as a Tool in the Social Scientific Study of Religion and Martin Riesebrodt's The Promise of Salvation." *Journal for the Scientific Study of Religion* 51 (3): 397–411. <https://doi.org/10.1111/j.1468-5906.2012.01663.x>.
- Konieczny, Mary Ellen, and Megan C. Rogers. 2016. "Religion, Secular Humanism, and Atheism: Multi-Institutional Politics and the USAFA Cadets' Freethinkers Group." *Journal for the Scientific Study of Religion* 55 (4): 821–38. <https://doi.org/10.1111/jssr.12296>.
- Kramer, Raquel Magidin de, Elizabeth Tighe, Leonard Saxe, and Daniel Parmer. 2018. "Assessing the Validity of Data Synthesis Methods to Estimate Religious Populations." *Journal for the Scientific Study of Religion* 57 (2): 206–20. <https://doi.org/10.1111/jssr.12513>.
- Kraus, Rachel. 2014. "Transforming Spirituality in Artistic Leisure: How the Spiritual Meaning of Belly Dance Changes Over Time." *Journal for the Scientific Study of Religion* 53 (3): 459–78. <https://doi.org/10.1111/jssr.12136>.
- Krause, Neal, and Elena Bastida. 2011. "Church-Based Social Relationships, Belonging, and Health Among Older Mexican Americans." *Journal for the Scientific Study of Religion* 50 (2): 397–409. <https://doi.org/10.1111/j.1468-5906.2011.01575.x>.
- Krause, Neal, Deborah Bruce, R. David Hayward, and Cynthia Woolever. 2014. "Gratitude to God, Self-Rated Health, and Depressive Symptoms." *Journal for the Scientific Study of Religion* 53 (2): 341–55. <https://doi.org/10.1111/jssr.12110>.
- Krause, Neal, and R. David Hayward. 2016. "Anxious Attachment to God, Spiritual Support, and Obesity: Findings from a Recent Nationwide Survey." *Journal for the Scientific Study of Religion* 55 (3): 485–97. <https://doi.org/10.1111/jssr.12284>.
- Krause, Neal, Kenneth I. Pargament, and Gail Ironson. 2017. "Spiritual Struggles and Health: Assessing the Influence of Socioeconomic Status." *Journal for the Scientific Study of Religion* 56 (3): 620–36. <https://doi.org/10.1111/jssr.12364>.
- . 2018. "Meaning in Life Moderates the Relationship Between Sacred Loss/Desecration and Health." *Journal for the Scientific Study of Religion* 57 (2): 365–76. <https://doi.org/10.1111/jssr.12522>.
- Kraybill, Donald B. 2019. "Response: How Do We Know What We Know About the Amish and Other Minorities?" *Journal for the Scientific Study of Religion* 58 (3): 743–52. <https://doi.org/10.1111/jssr.12619>.
- Kregting, Joris, Peer Scheepers, Paul Vermeer, and Chris Hermans. 2018. "Why God Has Left the Netherlands: Explanations for the Decline of Institutional Christianity in the Netherlands Between 1966 and 2015." *Journal for the Scientific Study of Religion* 57 (1): 58–79. <https://doi.org/10.1111/jssr.12499>.
- Krindatch, Alexei D., and Dean R. Hoge. 2010. "Satisfaction and Morale Among Parish Clergy: What American Catholic and Orthodox Priests Can Learn from Each Other." *Journal for the Scientific Study of Religion* 49 (1): 179–87. <https://doi.org/10.1111/j.1468-5906.2009.01500.x>.
- Kromphardt, Christopher D., Joseph L. Smith, and Anderson M. Starling. 2019. "Group Identification and Support for the Supreme Court: Evidence from Evangelical Protestants." *Journal for the Scientific Study of Religion* 58 (4): 854–73. <https://doi.org/10.1111/jssr.12635>.
- Krull, Laura M. 2020. "Liberal Churches and Social Justice Movements: Analyzing the Limits of Inclusivity." *Journal for the Scientific Study of Religion* 59 (1): 84–100. <https://doi.org/10.1111/jssr.12641>.

- Kucinskas, Jaime. 2010. "A Research Note on Islam and Gender Egalitarianism: An Examination of Egyptian and Saudi Arabian Youth Attitudes." *Journal for the Scientific Study of Religion* 49 (4): 761–70. <https://doi.org/10.1111/j.1468-5906.2010.01545.x>.
- Kucinskas, Jaime, Bradley R. E. Wright, D. Matthew Ray, and John Ortberg. 2017. "States of Spiritual Awareness by Time, Activity, and Social Interaction." *Journal for the Scientific Study of Religion* 56 (2): 418–37. <https://doi.org/10.1111/jssr.12331>.
- Kulis, Stephen S., and Monica Tsethlikai. 2016. "Urban American Indian Youth Spirituality and Religion: A Latent Class Analysis." *Journal for the Scientific Study of Religion* 55 (4): 677–97. <https://doi.org/10.1111/jssr.12298>.
- Künkler, Mirjam. 2019. "David Martin in Memoriam (1929–2019)." *Journal for the Scientific Study of Religion* 58 (4): 905–12. <https://doi.org/10.1111/jssr.12636>.
- Kurien, Prema. 2014. "The Impact of International Migration on Home Churches: The Mar Thoma Syrian Christian Church in India." *Journal for the Scientific Study of Religion* 53 (1): 109–29. <https://doi.org/10.1111/jssr.12082>.
- La Ferle, Carrie, and Sidharth Muralidharan. 2019. "Religion in Domestic Violence Prevention PSAs: The Role of Religiosity in Motivating Christian Bystanders to Intervene." *Journal for the Scientific Study of Religion* 58 (4): 874–90. <https://doi.org/10.1111/jssr.12624>.
- LaBouff, Jordan P., Wade C. Rowatt, Megan K. Johnson, Michelle Thedford, and Jo-Ann Tsang. 2010. "Development and Initial Validation of an Implicit Measure of Religiousness-Spirituality." *Journal for the Scientific Study of Religion* 49 (3): 439–55. <https://doi.org/10.1111/j.1468-5906.2010.01521.x>.
- Lawson, Ronald, and Ryan T. Cragun. 2012. "Comparing the Geographic Distributions and Growth of Mormons, Adventists, and Witnesses." *Journal for the Scientific Study of Religion* 51 (2): 220–40. <https://doi.org/10.1111/j.1468-5906.2012.01646.x>.
- Layman, Geoffrey C., Kerem Ozan Kalkan, and John C. Green. 2014. "A Muslim President? Misperceptions of Barack Obama's Faith in the 2008 Presidential Campaign." *Journal for the Scientific Study of Religion* 53 (3): 534–55. <https://doi.org/10.1111/jssr.12137>.
- Leamaster, Reid J. 2012. "A Research Note on English-Speaking Buddhists in the United States." *Journal for the Scientific Study of Religion* 51 (1): 143–55. <https://doi.org/10.1111/j.1468-5906.2011.01632.x>.
- Lechner, Clemens M., and Thomas Leopold. 2015. "Religious Attendance Buffers the Impact of Unemployment on Life Satisfaction: Longitudinal Evidence from Germany." *Journal for the Scientific Study of Religion* 54 (1): 166–74. <https://doi.org/10.1111/jssr.12171>.
- Lee, Bo Hyeong Jane, Lisa D. Pearce, and Kristen M. Schorpp. 2017. "Religious Pathways from Adolescence to Adulthood." *Journal for the Scientific Study of Religion* 56 (3): 678–89. <https://doi.org/10.1111/jssr.12367>.
- Lee, Sharon M., Feng Hou, Barry Edmonston, and Zheng Wu. 2017. "Religious Inter marriage in Canada, 1981 to 2011." *Journal for the Scientific Study of Religion* 56 (3): 667–77. <https://doi.org/10.1111/jssr.12362>.
- Lehman, Derek, and Darren E. Sherkat. 2018a. "Measuring Religious Identification in the United States." *Journal for the Scientific Study of Religion* 57 (4): 779–94. <https://doi.org/10.1111/jssr.12543>.
- . 2018b. "Specificity and Conceptual Clarity in the Measurement of Religious Identification." *Journal for the Scientific Study of Religion* 57 (4): 827–29. <https://doi.org/10.1111/jssr.12562>.
- Levi Martin, John, Tod Van Gunten, and Benjamin D. Zablocki. 2012. "Charisma, Status, and Gender in Groups With and Without Gurus." *Journal for the Scientific Study of Religion* 51 (1): 20–41. <https://doi.org/10.1111/j.1468-5906.2011.01633.x>.
- Lewis, Andrew R., and Dana Huyser De Bernardo. 2010. "Belonging Without Belonging: Utilizing Evangelical Self-Identification to Analyze Political Attitudes and Preferences." *Journal for the Scientific Study of Religion* 49 (1): 112–26. <https://doi.org/10.1111/j.1468-5906.2009.01495.x>.
- Lewis, Andrew R., Paul A. Djupe, Stephen T. Mockabee, and Joshua Su-Ya Wu. 2015. "The (Non) Religion of Mechanical Turk Workers." *Journal for the Scientific Study of Religion* 54 (2): 419–28. <https://doi.org/10.1111/jssr.12184>.
- Lewis, James R., Sean E. Currie, and Michael P. Oman-Reagan. 2016. "The Religion of the Educated Classes Revisited: New Religions, the Nonreligious, and Educational Levels." *Journal for the Scientific Study of Religion* 55 (1): 91–104. <https://doi.org/10.1111/jssr.12246>.
- Lewis, Valerie A., and Ridhi Kashyap. 2013. "Are Muslims a Distinctive Minority? An Empirical Analysis of Religiosity, Social Attitudes, and Islam." *Journal for the Scientific Study of Religion* 52 (3): 617–26. <https://doi.org/10.1111/jssr.12044>.

- Li, Kati. 2013. "Religion and Medicalization: The Case of ADHD." *Journal for the Scientific Study of Religion* 52 (2): 309–27. <https://doi.org/10.1111/jssr.12023>.
- Li, Yi, Robert Woodberry, Hexuan Liu, and Guang Guo. 2020. "Why Are Women More Religious than Men? Do Risk Preferences and Genetic Risk Predispositions Explain the Gender Gap?" *Journal for the Scientific Study of Religion* First published online. <https://doi.org/10.1111/jssr.12657>.
- Lim, Chaeyoon. 2013. "Counting the Faithful: Measuring Local Religious Contexts in the United States." *Journal for the Scientific Study of Religion* 52 (2): 386–400. <https://doi.org/10.1111/jssr.12027>.
- — —. 2015. "Religion and Subjective Well-Being Across Religious Traditions: Evidence from 1.3 Million Americans." *Journal for the Scientific Study of Religion* 54 (4): 684–701. <https://doi.org/10.1111/jssr.12232>.
- Lim, Chaeyoon, Carol Ann MacGregor, and Robert D. Putnam. 2010. "Secular and Liminal: Discovering Heterogeneity among Religious Nones." *Journal for the Scientific Study of Religion* 49 (4): 596–618.
- Lindsay, D. Michael, and Robert Wuthnow. 2010. "Financing Faith: Religion and Strategic Philanthropy." *Journal for the Scientific Study of Religion* 49 (1): 87–111. <https://doi.org/10.1111/j.1468-5906.2009.01494.x>.
- Liu, Eric Y. 2010. "Are Risk-Taking Persons Less Religious? Risk Preference, Religious Affiliation, and Religious Participation in Taiwan." *Journal for the Scientific Study of Religion* 49 (1): 172–78. <https://doi.org/10.1111/j.1468-5906.2009.01499.x>.
- LIU, YINGLING, and PAUL FROESE. 2020. "Faith and Agency: The Relationships Between Sense of Control, Socioeconomic Status, and Beliefs About God." *Journal for the Scientific Study of Religion* n/a (n/a). <https://doi.org/10.1111/jssr.12655>.
- Lu, Jun, and Qin Gao. 2018. "Contesting Chineseness: An Examination of Religion and National Identity in Mainland China." *Journal for the Scientific Study of Religion* 57 (2): 318–40. <https://doi.org/10.1111/jssr.12519>.
- Luria, Gil, Ram A. Cnaan, and Amnon Boehm. 2017. "Religious Attendance and Volunteering: Testing National Culture as a Boundary Condition." *Journal for the Scientific Study of Religion* 56 (3): 577–99. <https://doi.org/10.1111/jssr.12360>.
- Lussier, Danielle N. 2019. "Mosques, Churches, and Civic Skill Opportunities in Indonesia." *Journal for the Scientific Study of Religion* 58 (2): 415–38. <https://doi.org/10.1111/jssr.12589>.
- MacLean, Katherine A., Jeannie-Marie S. Leoutsakos, Matthew W. Johnson, and Roland R. Griffiths. 2012. "Factor Analysis of the Mystical Experience Questionnaire: A Study of Experiences Occasioned by the Hallucinogen Psilocybin." *Journal for the Scientific Study of Religion* 51 (4): 721–737.
- Madra, Aysel. 2015. "Interventionist Secularism: A Comparative Analysis of the Turkish Grand National Assembly (1923–1928) and the Indian Constituent Assembly (1946–1949) Debates." *Journal for the Scientific Study of Religion* 54 (2): 222–41. <https://doi.org/10.1111/jssr.12192>.
- Maliepaard, Mieke, Mérove Gijssberts, and Marcel Lubbers. 2012. "Reaching the Limits of Secularization? Turkish- and Moroccan-Dutch Muslims in the Netherlands 1998–2006." *Journal for the Scientific Study of Religion* 51 (2): 359–67. <https://doi.org/10.1111/j.1468-5906.2012.01647.x>.
- Manglos-Weber, Nicolette D. 2017. "Identity, Inequality, and Legitimacy: Religious Differences in Primary School Completion in Sub-Saharan Africa." *Journal for the Scientific Study of Religion* 56 (2): 302–322.
- Manongi, Freddy S., and Peter J. Balint. 2014. "Prayer Behavior in Rural Kilimanjaro, Tanzania." *Journal for the Scientific Study of Religion* 53 (4): 760–74. <https://doi.org/10.1111/jssr.12146>.
- Marshall, Joey, and Daniel V. A. Olson. 2018. "Local Religious Subcultures and Generalized Social Trust in the United States." *Journal for the Scientific Study of Religion* 57 (3): 473–94. <https://doi.org/10.1111/jssr.12539>.
- Marti, Gerardo. 2010a. "The Religious Racial Integration of African Americans into Diverse Churches." *Journal for the Scientific Study of Religion* 49 (2): 201–17. <https://doi.org/10.1111/j.1468-5906.2010.01503.x>.
- — —. 2010b. "When Does Religious Racial Integration 'Count'? A Caution About Seeking Ideal Ethnographic Cases." *Journal for the Scientific Study of Religion* 49 (2): 224–30. <https://doi.org/10.1111/j.1468-5906.2010.01505.x>.
- — —. 2016. "'I Was a Muslim, But Now I Am a Christian': Preaching, Legitimation, and Identity Management in a Southern Evangelical Church." *Journal for the Scientific Study of Religion* 55 (2): 250–70. <https://doi.org/10.1111/jssr.12261>.
- Martí, Gerardo. 2017. "New Concepts for New Dynamics: Generating Theory for the Study of Religious Innovation and Social Change." *Journal for the Scientific Study of Religion* 56 (1): 6–18. <https://doi.org/10.1111/jssr.12325>.
- Martinez, Brandon C., and Kevin D. Dougherty. 2013. "Race, Belonging, and Participation in Religious Congregations." *Journal for the Scientific Study of Religion* 52 (4): 713–32. <https://doi.org/10.1111/jssr.12073>.

- Martinez, Brandon, and Jeffrey Tamburello. 2018. "The Role of Whites in Lay Leadership Within Latino Churches." *Journal for the Scientific Study of Religion* 57 (1): 39–57. <https://doi.org/10.1111/jssr.12497>.
- Mataic, Dane R. 2018. "Countries Mimicking Neighbors: The Spatial Diffusion of Governmental Restrictions on Religion." *Journal for the Scientific Study of Religion* 57 (2): 221–37. <https://doi.org/10.1111/jssr.12518>.
- Mavor, Kenneth L., Winnifred R. Louis, and Brian Laythe. 2011. "Religion, Prejudice, and Authoritarianism: Is RWA a Boon or Bane to the Psychology of Religion?" *Journal for the Scientific Study of Religion* 50 (1): 22–43. <https://doi.org/10.1111/j.1468-5906.2010.01550.x>.
- May, Matthew, and David Smilde. 2018. "Does Funding Impact Our Research? Causality, Normativity, and Diversity in 40 Years of U.S. Sociology of Religion." *Journal for the Scientific Study of Religion* 57 (3): 432–49. <https://doi.org/10.1111/jssr.12536>.
- Mayrl, Damon. 2018. "The Judicialization of Religious Freedom: An Institutional Approach." *Journal for the Scientific Study of Religion* 57 (3): 514–30. <https://doi.org/10.1111/jssr.12532>.
- McAndrew, Siobhan, and Lindsay Richards. 2020. "Religiosity, Secular Participation, and Cultural Socialization: A Case Study of the 1933–1942 Urban English Cohort." *Journal for the Scientific Study of Religion* n/a (n/a). <https://doi.org/10.1111/jssr.12649>.
- McCarthy, Angela F., Laura R. Olson, and James C. Garand. 2019. "Religious Right, Religious Left, Both, or Neither? Understanding Religio-Political Identification." *Journal for the Scientific Study of Religion* 58 (3): 547–69. <https://doi.org/10.1111/jssr.12618>.
- McClure, Jennifer. 2013. "Sources of Social Support: Examining Congregational Involvement, Private Devotional Activities, and Congregational Context." *Journal for the Scientific Study of Religion* 52 (4): 698–712. <https://doi.org/10.1111/jssr.12076>.
- McClure, Paul K. 2017. "Tinkering with Technology and Religion in the Digital Age: The Effects of Internet Use on Religious Belief, Behavior, and Belonging." *Journal for the Scientific Study of Religion* 56 (3): 481–97. <https://doi.org/10.1111/jssr.12365>.
- McDaniel, Eric L. 2016. "What Kind of Christian Are You? Religious Ideologies and Political Attitudes." *Journal for the Scientific Study of Religion* 55 (2): 288–307. <https://doi.org/10.1111/jssr.12264>.
- McKendry-Smith, Emily. 2016. "'Baba Has Come to Civilize Us': Developmental Idealism and Framing the Strict Demands of the Brahma Kumaris." *Journal for the Scientific Study of Religion* 55 (4): 698–716. <https://doi.org/10.1111/jssr.12297>.
- Meador, Keith G. 2017. "Madness: American Protestant Responses to Mental Illness. By Heather H. Vacek. Waco, Texas: Baylor University Press, 2015 (Xii + 271 Pp., \$39.95, Cloth)." *Journal for the Scientific Study of Religion* 56 (1): 218–20. <https://doi.org/10.1111/jssr.12343>.
- Merino, Stephen M. 2010. "Religious Diversity in a 'Christian Nation': The Effects of Theological Exclusivity and Interreligious Contact on the Acceptance of Religious Diversity." *Journal for the Scientific Study of Religion* 49 (2): 231–46. <https://doi.org/10.1111/j.1468-5906.2010.01506.x>.
- . 2014. "Social Support and the Religious Dimensions of Close Ties." *Journal for the Scientific Study of Religion* 53 (3): 595–612. <https://doi.org/10.1111/jssr.12134>.
- Meyer, Katherine, Eileen Barker, Helen Rose Ebaugh, and Mark Juergensmeyer. 2011. "Religion in Global Perspective: SSSR Presidential Panel." *Journal for the Scientific Study of Religion* 50 (2): 240–51. <https://doi.org/10.1111/j.1468-5906.2011.01565.x>.
- Miller, Brian J. 2017. "Growing Suburbs, Relocating Churches: The Suburbanization of Protestant Churches in the Chicago Region, 1925–1990." *Journal for the Scientific Study of Religion* 56 (2): 342–64. <https://doi.org/10.1111/jssr.12336>.
- Minarik, Pavol. 2014. "Employment, Wages, and Religious Revivals in Postcommunist Countries." *Journal for the Scientific Study of Religion* 53 (2): 296–315. <https://doi.org/10.1111/jssr.12113>.
- Minton, Elizabeth A., Lynn R. Kahle, Tan Soo Jiuan, and Siok Kuan Tambyah. 2016. "Addressing Criticisms of Global Religion Research: A Consumption-Based Exploration of Status and Materialism, Sustainability, and Volunteering Behavior." *Journal for the Scientific Study of Religion* 55 (2): 365–83. <https://doi.org/10.1111/jssr.12260>.
- Mixon Jr., Franklin G., and Kamal P. Upadhyaya. 2018. "Quality Choice and Product Differentiation in Monopoly Theory: An Application to the Puritan Church." *Journal for the Scientific Study of Religion* 57 (1): 173–82. <https://doi.org/10.1111/jssr.12494>.

- Moaddel, Mansoor, and Stuart A. Karabenick. 2018. "Religious Fundamentalism in Eight Muslim-Majority Countries: Reconceptualization and Assessment." *Journal for the Scientific Study of Religion* 57 (4): 676–706. <https://doi.org/10.1111/jssr.12549>.
- Moody, Katharine Sarah, and Randall W. Reed. 2017. "Emerging Christianity and Religious Identity." *Journal for the Scientific Study of Religion* 56 (1): 33–40. <https://doi.org/10.1111/jssr.12327>.
- Morton, Kelly R., Laura Tanzini, and Jerry W. Lee. 2019. "Adult Life Satisfaction and the Role of Forgiveness After Childhood Sexual Abuse: Evidence from a Seventh-Day Adventist Cohort." *Journal for the Scientific Study of Religion* 58 (1): 138–52. <https://doi.org/10.1111/jssr.12575>.
- Müller, Tim S., Nan Dirk De Graaf, and Peter Schmidt. 2014. "Which Societies Provide a Strong Religious Socialization Context? Explanations Beyond the Effects of National Religiosity." *Journal for the Scientific Study of Religion* 53 (4): 739–59. <https://doi.org/10.1111/jssr.12147>.
- Nartonis, David K. 2010. "The Rise of 19th-Century American Spiritualism, 1854–1873." *Journal for the Scientific Study of Religion* 49 (2): 361–73. <https://doi.org/10.1111/j.1468-5906.2010.01515.x>.
- Newheiser, Anna-Kaisa, Miles Hewstone, Alberto Voci, and Katharina Schmid. 2015. "Making and Unmaking Prejudice: Religious Affiliation Mitigates the Impact of Mortality Salience on Out-Group Attitudes." *Journal for the Scientific Study of Religion* 54 (4): 774–91. <https://doi.org/10.1111/jssr.12233>.
- Neyrinck, Bart, Willy Lens, Maarten Vansteenkiste, and Bart Soenens. 2010. "Updating Allport's and Batson's Framework of Religious Orientations: A Reevaluation from the Perspective of Self-Determination Theory and Wulff's Social Cognitive Model." *Journal for the Scientific Study of Religion* 49 (3): 425–38. <https://doi.org/10.1111/j.1468-5906.2010.01520.x>.
- Nie, Fanhao, and Daniel V. A. Olson. 2016. "Demoniac Influence: The Negative Mental Health Effects of Belief in Demons." *Journal for the Scientific Study of Religion* 55 (3): 498–515. <https://doi.org/10.1111/jssr.12287>.
- Nie, Fanhao, and Xiaozhao Y. Yang. 2019. "The Moral Community Divide: Underage Marijuana Use Across Religious Contexts." *Journal for the Scientific Study of Religion* 58 (1): 153–73. <https://doi.org/10.1111/jssr.12577>.
- O'Brien, Timothy L., and Shiri Noy. 2018. "Cultural Authority in Comparative Context: A Multilevel Analysis of Trust in Science and Religion." *Journal for the Scientific Study of Religion* 57 (3): 495–513. <https://doi.org/10.1111/jssr.12537>.
- Ochs, Peter, Nauman Faizi, Jonathan Teubner, and Zain Moulvi. 2019. "Value Predicate Analysis: A Language-Based Tool for Diagnosing Behavioral Tendencies of Religious or Value-Based Groups in Regions of Conflict." *Journal for the Scientific Study of Religion* 58 (1): 93–113. <https://doi.org/10.1111/jssr.12574>.
- Offutt, Stephen. 2011. "The Role of Short-Term Mission Teams in the New Centers of Global Christianity." *Journal for the Scientific Study of Religion* 50 (4): 796–811. <https://doi.org/10.1111/j.1468-5906.2011.01600.x>.
- Offutt, Stephen, LiErin Probasco, and Brandon Vaidyanathan. 2016. "Religion, Poverty, and Development." *Journal for the Scientific Study of Religion* 55 (2): 207–15. <https://doi.org/10.1111/jssr.12270>.
- Ogland, Curtis P., John P. Bartkowski, Thankam S. Sunil, and Xiaohe Xu. 2010. "Religious Influences on Teenage Childbearing Among Brazilian Female Adolescents: A Research Note." *Journal for the Scientific Study of Religion* 49 (4): 754–60. <https://doi.org/10.1111/j.1468-5906.2010.01544.x>.
- Ogland, Curtis P., and Ana Paula Verona. 2011. "Religion and Attitudes Toward Abortion and Abortion Policy in Brazil." *Journal for the Scientific Study of Religion* 50 (4): 812–21. <https://doi.org/10.1111/j.1468-5906.2011.01602.x>.
- Oldmixon, Elizabeth A. 2017. "Religious Representation and Animal Welfare in the U.S. Senate." *Journal for the Scientific Study of Religion* 56 (1): 162–78. <https://doi.org/10.1111/jssr.12317>.
- Olson, Daniel V. A., and Miao Li. 2015. "Does a Nation's Religious Composition Affect Generalized Trust? The Role of Religious Heterogeneity and the Percent Religious." *Journal for the Scientific Study of Religion* 54 (4): 756–73. <https://doi.org/10.1111/jssr.12231>.
- Olson, Daniel V. A., and Paul Perl. 2011. "A Friend in Creed: Does the Religious Composition of Geographic Areas Affect the Religious Composition of a Person's Close Friends?" *Journal for the Scientific Study of Religion* 50 (3): 483–502. <https://doi.org/10.1111/j.1468-5906.2011.01581.x>.
- Olson, Daniel v.a., Joey Marshall, Jong Hyun Jung, and David Voas. 2020. "Sacred Canopies or Religious Markets? The Effect of County-Level Religious Diversity on Later Changes in Religious Involvement." *Journal for the Scientific Study of Religion* n/a (n/a). <https://doi.org/10.1111/jssr.12651>.
- Olson, Laura R. 2011. "The Essentiality of 'Culture' in the Study of Religion and Politics." *Journal for the Scientific Study of Religion* 50 (4): 639–53. <https://doi.org/10.1111/j.1468-5906.2011.01608.x>.

- Olson, Paul J., and David Beckworth. 2011. "Religious Change and Stability: Seasonality in Church Attendance from the 1940s to the 2000s." *Journal for the Scientific Study of Religion* 50 (2): 388–96. <https://doi.org/10.1111/j.1468-5906.2011.01574.x>.
- Orman, Wafa Hakim. 2019. "Religiosity and Financial Crises in the United States." *Journal for the Scientific Study of Religion* 58 (1): 20–46. <https://doi.org/10.1111/jssr.12566>.
- Ottoni-Wilhelm, Mark. 2010. "Giving to Organizations That Help People in Need: Differences Across Denominational Identities." *Journal for the Scientific Study of Religion* 49 (3): 389–412. <https://doi.org/10.1111/j.1468-5906.2010.01518.x>.
- Patterson, Richard, and Joseph Price. 2012. "Pornography, Religion, and the Happiness Gap: Does Pornography Impact the Actively Religious Differently?" *Journal for the Scientific Study of Religion* 51 (1): 79–89. <https://doi.org/10.1111/j.1468-5906.2011.01630.x>.
- Pearce, Lisa D., E. Michael Foster, and Jessica Halliday Hardie. 2013. "A Person-Centered Examination of Adolescent Religiosity Using Latent Class Analysis." *Journal for the Scientific Study of Religion* 52 (1): 57–79. <https://doi.org/10.1111/jssr.12001>.
- Peker, Efe. 2019. "Bringing the State Back in Secularization: The Development of Laïcité in the French Third Republic (1875–1905)." *Journal for the Scientific Study of Religion* 58 (4): 813–32. <https://doi.org/10.1111/jssr.12625>.
- Pelz, Mikael L., and Corwin E. Smidt. 2015. "Generational Conversion? The Role of Religiosity in the Politics of Evangelicals." *Journal for the Scientific Study of Religion* 54 (2): 380–401. <https://doi.org/10.1111/jssr.12186>.
- Pepper, Miriam, Tim Jackson, and David Uzzell. 2010. "A Study of Multidimensional Religion Constructs and Values in the United Kingdom." *Journal for the Scientific Study of Religion* 49 (1): 127–46. <https://doi.org/10.1111/j.1468-5906.2009.01496.x>.
- Perry, Samuel L. 2013a. "Social Capital, Race, and Personal Fundraising in Evangelical Outreach Ministries." *Journal for the Scientific Study of Religion* 52 (1): 159–78. <https://doi.org/10.1111/jssr.12005>.
- . 2013b. "Religion and Whites' Attitudes Toward Interracial Marriage with African Americans, Asians, and Latinos." *Journal for the Scientific Study of Religion* 52 (2): 425–42. <https://doi.org/10.1111/jssr.12020>.
- . 2014. "Hoping for a Godly (White) Family: How Desire for Religious Heritage Affects Whites' Attitudes Toward Interracial Marriage." *Journal for the Scientific Study of Religion* 53 (1): 202–18. <https://doi.org/10.1111/jssr.12079>.
- . 2015. "Bible Beliefs, Conservative Religious Identity, and Same-Sex Marriage Support: Examining Main and Moderating Effects." *Journal for the Scientific Study of Religion* 54 (4): 792–813. <https://doi.org/10.1111/jssr.12212>.
- Perry, Samuel L., and Ryan P. Burge. 2020. "How Religion Predicts Pet Ownership in the United States." *Journal for the Scientific Study of Religion* 59 (1): 190–201. <https://doi.org/10.1111/jssr.12637>.
- Perry, Samuel L., and Kyle C. Longest. 2019. "Examining the Impact of Religious Initiation Rites on Religiosity and Disaffiliation over Time." *Journal for the Scientific Study of Religion* 58 (4): 891–904. <https://doi.org/10.1111/jssr.12632>.
- Perry, Samuel L., and Cyrus Schleifer. 2019. "Are Bivocational Clergy Becoming the New Normal? An Analysis of the Current Population Survey, 1996–2017." *Journal for the Scientific Study of Religion* 58 (2): 513–25. <https://doi.org/10.1111/jssr.12593>.
- Perry, Samuel L., and Andrew L. Whitehead. 2016a. "Religion and Public Opinion Toward Same-Sex Relations, Marriage, and Adoption: Does the Type of Practice Matter?" *Journal for the Scientific Study of Religion* 55 (3): 637–51. <https://doi.org/10.1111/jssr.12215>.
- . 2016b. "For Better or for Worse? Gender Ideology, Religious Commitment, and Relationship Quality." *Journal for the Scientific Study of Religion* 55 (4): 737–55. <https://doi.org/10.1111/jssr.12308>.
- Petts, Richard J. 2018. "Miscarriage, Religious Participation, and Mental Health." *Journal for the Scientific Study of Religion* 57 (1): 109–22. <https://doi.org/10.1111/jssr.12500>.
- Pfaff, Steven, and Katie E. Corcoran. 2012. "Piety, Power, and the Purse: Religious Economies Theory and Urban Reform in the Holy Roman Empire." *Journal for the Scientific Study of Religion* 51 (4): 757–76. <https://doi.org/10.1111/j.1468-5906.2012.01680.x>.
- Phillips III, Russell E., Sierrah Avant, David Kalp, David Cenkner, Michael Lucci, Rachel Herndon, and Alex Maccarelli. 2017. "Initial Validation of Measures of Sanctification in Same-Sex Romantic Relationships and Sexual Behavior." *Journal for the Scientific Study of Religion* 56 (4): 836–51. <https://doi.org/10.1111/jssr.12488>.



- Phillips, Russell E., Clara Michelle Cheng, Carmen Oemig, Lisa Hietbrink, and Erica Vonnegut. 2012. "Validation of a Buddhist Coping Measure Among Primarily Non-Asian Buddhists in the United States." *Journal for the Scientific Study of Religion* 51 (1): 156–72. <https://doi.org/10.1111/j.1468-5906.2012.01620.x>.
- Pitt, Richard N. 2010a. "Fear of a Black Pulpit? Real Racial Transcendence Versus Cultural Assimilation in Multiracial Churches." *Journal for the Scientific Study of Religion* 49 (2): 218–23. <https://doi.org/10.1111/j.1468-5906.2010.01504.x>.
- — —. 2010b. "'Killing the Messenger': Religious Black Gay Men's Neutralization of Anti-Gay Religious Messages." *Journal for the Scientific Study of Religion* 49 (1): 56–72. <https://doi.org/10.1111/j.1468-5906.2009.01492.x>.
- Poulson, Stephen C. 2011. "Parochialism in the Social Scientific Study of Religion: A Response to Cornwall." *Journal for the Scientific Study of Religion* 50 (2): 227–28. <https://doi.org/10.1111/j.1468-5906.2011.01563.x>.
- Probasco, LiErin. 2016. "Prayer, Patronage, and Personal Agency in Nicaraguan Accounts of Receiving International Aid." *Journal for the Scientific Study of Religion* 55 (2): 233–49. <https://doi.org/10.1111/jssr.12263>.
- Rafiqi, Arzoo. 2019. "A Clash of Civilizations? Muslims, Christians, and Preferences for Democracy." *Journal for the Scientific Study of Religion* 58 (3): 689–706. <https://doi.org/10.1111/jssr.12614>.
- Rainville, G. 2018. "Religious Service Attendance Aids Coping by Providing a Sense of Continuity: A Test of the Stress-Support Matching Hypothesis Using Mental Health Outcome Measures." *Journal for the Scientific Study of Religion* 57 (2): 396–408. <https://doi.org/10.1111/jssr.12524>.
- Rainville, G., and Laura Mehegan. 2019. "God, Purpose in Life, and Mental Well-Being Among Older Adults." *Journal for the Scientific Study of Religion* 58 (1): 287–300. <https://doi.org/10.1111/jssr.12565>.
- Ramos, Aida I., Gerardo Martí, and Mark T. Mulder. 2020. "The Strategic Practice of 'Fiesta' in a Latino Protestant Church: Religious Racialization and the Performance of Ethnic Identity." *Journal for the Scientific Study of Religion* 59 (1): 161–79. <https://doi.org/10.1111/jssr.12646>.
- Raynold, Prosper. 2014. "Sacrifice and Stigma: Managing Religious Risk." *Journal for the Scientific Study of Religion* 53 (4): 826–47. <https://doi.org/10.1111/jssr.12153>.
- Read, Jen'nan G., and David E. Eagle. 2011. "Intersecting Identities as a Source of Religious Incongruence." *Journal for the Scientific Study of Religion* 50 (1): 116–32. <https://doi.org/10.1111/j.1468-5906.2010.01555.x>.
- Rebhun, Uzi. 2014. "Immigrant Acculturation and Transnationalism: Israelis in the United States and Europe Compared." *Journal for the Scientific Study of Religion* 53 (3): 613–35. <https://doi.org/10.1111/jssr.12135>.
- Reed, Jean-Pierre, and Sarah Pitcher. 2015. "Religion and Revolutionary We-Ness: Religious Discourse, Speech Acts, and Collective Identity in Prerevolutionary Nicaragua." *Journal for the Scientific Study of Religion* 54 (3): 477–500. <https://doi.org/10.1111/jssr.12213>.
- Reed, Randall. 2012. "Of Prophets and Propaganda: An Exploration of Modern Christian Dispensationalism Using the Work of Martin Riesebrodt." *Journal for the Scientific Study of Religion* 51 (3): 468–81. <https://doi.org/10.1111/j.1468-5906.2012.01664.x>.
- Reimer, Sam. 2011. "Orthodoxy Niches: Diversity in Congregational Orthodoxy Among Three Protestant Denominations in the United States." *Journal for the Scientific Study of Religion* 50 (4): 763–79. <https://doi.org/10.1111/j.1468-5906.2011.01598.x>.
- Reutter, Kirby K., and Silvia M. Bigatti. 2014. "Religiosity and Spirituality as Resiliency Resources: Moderation, Mediation, or Moderated Mediation?" *Journal for the Scientific Study of Religion* 53 (1): 56–72. <https://doi.org/10.1111/jssr.12081>.
- Ribberink, Egbert, Peter Achterberg, and Dick Houtman. 2017. "Secular Tolerance? Anti-Muslim Sentiment in Western Europe." *Journal for the Scientific Study of Religion* 56 (2): 259–76. <https://doi.org/10.1111/jssr.12335>.
- Richardson, James T. 2015. "Managing Religion and the Judicialization of Religious Freedom." *Journal for the Scientific Study of Religion* 54 (1): 1–19. <https://doi.org/10.1111/jssr.12172>.
- Rigo, Caroline, Filip Uzarevic, and Vassilis Saroglou. 2016. "Make Love and Lose Your Religion and Virtue: Recalling Sexual Experiences Undermines Spiritual Intentions and Moral Behavior." *Journal for the Scientific Study of Religion* 55 (1): 23–39. <https://doi.org/10.1111/jssr.12244>.
- Rissanen, Inkeri, Kirsi Tirri, and Elina Kuusisto. 2015. "Finnish Teachers' Attitudes About Muslim Students and Muslim Student Integration." *Journal for the Scientific Study of Religion* 54 (2): 277–90. <https://doi.org/10.1111/jssr.12190>.
- Ritter, Ryan S., and Jesse Lee Preston. 2013. "Representations of Religious Words: Insights for Religious Priming Research." *Journal for the Scientific Study of Religion* 52 (3): 494–507. <https://doi.org/10.1111/jssr.12042>.

- Robinson, Oliver C., Karina Hanson, Guy Hayward, and David Lorimer. 2019. "Age and Cultural Gender Equality as Moderators of the Gender Difference in the Importance of Religion and Spirituality: Comparing the United Kingdom, France, and Germany." *Journal for the Scientific Study of Religion* 58 (1): 301–8. <https://doi.org/10.1111/jssr.12567>.
- Rockenbach, Alyssa N., Nicholas A. Bowman, Tiffani Riggers-Piehl, Matthew J. Mayhew, and Rebecca E. Crandall. 2017. "Respecting the LDS/Mormon Minority on Campus: College Students' Attitudes Toward Latter-Day Saints." *Journal for the Scientific Study of Religion* 56 (4): 798–819. <https://doi.org/10.1111/jssr.12481>.
- Rogers, Richard Lee. 2010. "The Urban Threshold and the Second Great Awakening: Revivalism in New York State, 1825–1835." *Journal for the Scientific Study of Religion* 49 (4): 694–709. <https://doi.org/10.1111/j.1468-5906.2010.01540.x>.
- Rossi, Maurizio, and Ettore Scappini. 2014. "Church Attendance, Problems of Measurement, and Interpreting Indicators: A Study of Religious Practice in the United States, 1975–2010." *Journal for the Scientific Study of Religion* 53 (2): 249–67. <https://doi.org/10.1111/jssr.12115>.
- . 2016. "The Dynamics of Religious Practice in Spain from the Mid-19th Century to 2010." *Journal for the Scientific Study of Religion* 55 (3): 579–96. <https://doi.org/10.1111/jssr.12280>.
- Roth, David L., Therri Usher, Eddie M. Clark, and Cheryl L. Holt. 2016. "Religious Involvement and Health Over Time: Predictive Effects in a National Sample of African Americans." *Journal for the Scientific Study of Religion* 55 (2): 417–24. <https://doi.org/10.1111/jssr.12269>.
- Ruah-Midbar, Marianna, and Adam Klin-Oron. 2013. "'Tell Me Who Your Enemies Are': Government Reports About the 'Cult' Phenomenon in Israel." *Journal for the Scientific Study of Religion* 52 (4): 810–26. <https://doi.org/10.1111/jssr.12067>.
- Sager, Rebecca. 2011. "Faith-Based Social Services: Saving the Body or the Soul? A Research Note." *Journal for the Scientific Study of Religion* 50 (1): 201–10. <https://doi.org/10.1111/j.1468-5906.2010.01560.x>.
- Sansani, Shahar. 2019. "Are the Religiously Observant Discriminated Against in the Rental Housing Market? Experimental Evidence from Israel." *Journal for the Scientific Study of Religion* 58 (2): 459–74. <https://doi.org/10.1111/jssr.12596>.
- Sarkissian, Ani. 2012. "Religion and Civic Engagement in Muslim Countries." *Journal for the Scientific Study of Religion* 51 (4): 607–22. <https://doi.org/10.1111/j.1468-5906.2012.01677.x>.
- Schafer, Markus H. 2013. "Close Ties, Intercessory Prayer, and Optimism Among American Adults: Locating God in the Social Support Network." *Journal for the Scientific Study of Religion* 52 (1): 35–56. <https://doi.org/10.1111/jssr.12010>.
- Schafer, Markus H., and Laura Upenieks. 2016. "Trans-Congregational Triadic Closure: Churchgoers' Networks Within and Beyond the Pews." *Journal for the Scientific Study of Religion* 55 (3): 597–621. <https://doi.org/10.1111/jssr.12281>.
- Scheitle, Christopher P. 2011. "U.S. College Students' Perception of Religion and Science: Conflict, Collaboration, or Independence? A Research Note." *Journal for the Scientific Study of Religion* 50 (1): 175–86. <https://doi.org/10.1111/j.1468-5906.2010.01558.x>.
- Scheitle, Christopher P., and Elaine Howard Ecklund. 2018. "Perceptions of Religious Discrimination Among U.S. Scientists." *Journal for the Scientific Study of Religion* 57 (1): 139–55. <https://doi.org/10.1111/jssr.12503>.
- Scheitle, Christopher P., and Michelle Hansmann. 2016. "Religion-Related Hate Crimes: Data, Trends, and Limitations." *Journal for the Scientific Study of Religion* 55 (4): 859–73. <https://doi.org/10.1111/jssr.12299>.
- Scheitle, Christopher P., Jennifer B. Kane, and Jennifer Van Hook. 2011. "Demographic Imperatives and Religious Markets: Considering the Individual and Interactive Roles of Fertility and Switching in Group Growth." *Journal for the Scientific Study of Religion* 50 (3): 470–82. <https://doi.org/10.1111/j.1468-5906.2011.01580.x>.
- Scheitle, Christopher P., and John D. McCarthy. 2018. "The Mobilization of Evangelical Protestants in the Nonprofit Sector: Parachurch Foundings Across U.S. Counties, 1998–2016." *Journal for the Scientific Study of Religion* 57 (2): 238–57. <https://doi.org/10.1111/jssr.12523>.
- Scheitle, Christopher P., and Buster G. Smith. 2011. "A Note on the Frequency and Sources of Close Interreligious Ties." *Journal for the Scientific Study of Religion* 50 (2): 410–21. <https://doi.org/10.1111/j.1468-5906.2011.01576.x>.
- Schieman, Scott. 2011. "Education and the Importance of Religion in Decision Making: Do Other Dimensions of Religiousness Matter?" *Journal for the Scientific Study of Religion* 50 (3): 570–87. <https://doi.org/10.1111/j.1468-5906.2011.01583.x>.

- Schieman, Scott, Alex Bierman, and Christopher G. Ellison. 2010. "Religious Involvement, Beliefs About God, and the Sense of Mattering Among Older Adults." *Journal for the Scientific Study of Religion* 49 (3): 517–35. <https://doi.org/10.1111/j.1468-5906.2010.01526.x>.
- Schieman, Scott, Alex Bierman, and Laura Upenieks. 2018. "The Powerful Other: How Divine Control Shapes the Relationship Between Personal Control and Psychological Distress." *Journal for the Scientific Study of Religion* 57 (1): 123–38. <https://doi.org/10.1111/jssr.12502>.
- — —. 2019. "Beyond 'Heartless Conservative' and 'Bleeding Heart Liberal' Caricatures: How Religiosity Shapes the Relationship Between Political Orientation and Empathy." *Journal for the Scientific Study of Religion* 58 (2): 360–77. <https://doi.org/10.1111/jssr.12595>.
- Schieman, Scott, and Jong Hyun Jung. 2012. "'Practical Divine Influence': Socioeconomic Status and Belief in the Prosperity Gospel." *Journal for the Scientific Study of Religion* 51 (4): 738–56. <https://doi.org/10.1111/j.1468-5906.2012.01682.x>.
- Schleifer, Cyrus, and Mark Chaves. 2016. "The Price of the Calling: Exploring Clergy Compensation Using Current Population Survey Data." *Journal for the Scientific Study of Religion* 55 (1): 130–52. <https://doi.org/10.1111/jssr.12254>.
- Schnabel, Landon. 2015. "How Religious Are American Women and Men? Gender Differences and Similarities." *Journal for the Scientific Study of Religion* 54 (3): 616–22. <https://doi.org/10.1111/jssr.12214>.
- Schnabel, Landon, Conrad Hackett, and David McClendon. 2018. "Where Men Appear More Religious Than Women: Turning a Gender Lens on Religion in Israel." *Journal for the Scientific Study of Religion* 57 (1): 80–94. <https://doi.org/10.1111/jssr.12498>.
- Schnabel, Allison. 2016. "What Religion Affords Grassroots NGOs: Frames, Networks, Modes of Action." *Journal for the Scientific Study of Religion* 55 (2): 216–32. <https://doi.org/10.1111/jssr.12272>.
- Schoon, Eric W., and A. Joseph West. 2017. "From Prophecy to Practice: Mutual Selection Cycles in the Routinization of Charismatic Authority." *Journal for the Scientific Study of Religion* 56 (4): 781–97. <https://doi.org/10.1111/jssr.12483>.
- Schwadel, Philip. 2010. "Period and Cohort Effects on Religious Nonaffiliation and Religious Disaffiliation: A Research Note." *Journal for the Scientific Study of Religion* 49 (2): 311–19. <https://doi.org/10.1111/j.1468-5906.2010.01511.x>.
- — —. 2015. "Explaining Cross-National Variation in the Effect of Higher Education on Religiosity." *Journal for the Scientific Study of Religion* 54 (2): 402–18. <https://doi.org/10.1111/jssr.12187>.
- — —. 2017. "The Positives and Negatives of Higher Education: How the Religious Context in Adolescence Moderates the Effects of Education on Changes in Religiosity." *Journal for the Scientific Study of Religion* 56 (4): 869–85. <https://doi.org/10.1111/jssr.12486>.
- — —. 2020. "The Politics of Religious Nones." *Journal for the Scientific Study of Religion* 59 (1): 180–89. <https://doi.org/10.1111/jssr.12640>.
- Schwadel, Philip, and Erik Johnson. 2017. "The Religious and Political Origins of Evangelical Protestants' Opposition to Environmental Spending." *Journal for the Scientific Study of Religion* 56 (1): 179–98. <https://doi.org/10.1111/jssr.12322>.
- Scroggs, Barrett, Jason M. Miller, and M. Hunter Stanfield. 2018. "Identity Development and Integration of Religious Identities in Gender and Sexual Minority Emerging Adults." *Journal for the Scientific Study of Religion* 57 (3): 604–15. <https://doi.org/10.1111/jssr.12538>.
- Sears, Robert E. 2015. "The Construction, Preliminary Validation, and Correlates of a Dream-Specific Scale for Mystical Experience." *Journal for the Scientific Study of Religion* 54 (1): 134–55. <https://doi.org/10.1111/jssr.12169>.
- Sepulvado, Brandon, David Hachen, Michael Penta, and Omar Lizardo. 2015. "Social Affiliation from Religious Disaffiliation: Evidence of Selective Mixing Among Youth with No Religious Preference During the Transition to College." *Journal for the Scientific Study of Religion* 54 (4): 833–41. <https://doi.org/10.1111/jssr.12227>.
- Seymour, Jeffrey M., Michael R. Welch, Karen Monique Gregg, and Jessica Collett. 2014. "Generating Trust in Congregations: Engagement, Exchange, and Social Networks." *Journal for the Scientific Study of Religion* 53 (1): 130–44. <https://doi.org/10.1111/jssr.12083>.

- Shafer, Kevin, Richard J. Petts, and Andrew J. Renick. 2019. "Religious Variability in the Relationship Between Masculinity and Father Involvement." *Journal for the Scientific Study of Religion* 58 (2): 378–97. <https://doi.org/10.1111/jssr.12591>.
- Shah, Sarah, John P. Bartkowski, and Xiaohu Xu. 2016. "Gendered God Imagery and Attitudes Toward Mothers' Labor Force Participation: Examining the Transposable Character of Religious Schemas." *Journal for the Scientific Study of Religion* 55 (3): 540–57. <https://doi.org/10.1111/jssr.12279>.
- Sharp, Shane. 2012. "Prayer Utterances as Aligning Actions." *Journal for the Scientific Study of Religion* 51 (2): 257–65. <https://doi.org/10.1111/j.1468-5906.2012.01638.x>.
- . 2013. "When Prayers Go Unanswered." *Journal for the Scientific Study of Religion* 52 (1): 1–16. <https://doi.org/10.1111/jssr.12013>.
- Shelton, Jason E. 2018. "Is RELTRAD Still the Gold Standard?" *Journal for the Scientific Study of Religion* 57 (4): 817–26.
- Shelton, Jason E., and Ryon J. Cobb. 2017. "Black Reltrad: Measuring Religious Diversity and Commonality Among African Americans." *Journal for the Scientific Study of Religion* 56 (4): 737–64. <https://doi.org/10.1111/jssr.12378>.
- Sherkat, Darren E. 2016. "Sexuality and Religious Commitment Revisited: Exploring the Religious Commitments of Sexual Minorities, 1991–2014." *Journal for the Scientific Study of Religion* 55 (4): 756–69. <https://doi.org/10.1111/jssr.12300>.
- Sherkat, Darren E., and Derek Lehman. 2018. "Identifications, Identities, and Beliefs: Why the Scientific Study of Religion Should Not Take Shortcuts." *Journal for the Scientific Study of Religion* 57 (4): 848–53. <https://doi.org/10.1111/jssr.12556>.
- Sheskin, Ira M., and Harriet Hartman. 2015. "Denominational Variations Across American Jewish Communities." *Journal for the Scientific Study of Religion* 54 (2): 205–21. <https://doi.org/10.1111/jssr.12189>.
- Shor, Eran, and David J. Roelfs. 2013. "The Longevity Effects of Religious and Nonreligious Participation: A Meta-Analysis and Meta-Regression." *Journal for the Scientific Study of Religion* 52 (1): 120–45. <https://doi.org/10.1111/jssr.12006>.
- Shulgin, Sergey, Julia Zinkina, and Andrey Korotayev. 2019. "Religiosity and Aging: Age and Cohort Effects and Their Implications for the Future of Religious Values in High-Income OECD Countries." *Journal for the Scientific Study of Religion* 58 (3): 591–603. <https://doi.org/10.1111/jssr.12613>.
- Shults, F. LeRon, Wesley J. Wildman, Ann Taves, and Raymond F. Paloutzian. 2020. "What Do Religion Scholars Really Want? Scholarly Values in the Scientific Study of Religion." *Journal for the Scientific Study of Religion* 59 (1): 18–38. <https://doi.org/10.1111/jssr.12643>.
- Sigalow, Emily, and Nicole S. Fox. 2014. "Perpetuating Stereotypes: A Study of Gender, Family, and Religious Life in Jewish Children's Books." *Journal for the Scientific Study of Religion* 53 (2): 416–31. <https://doi.org/10.1111/jssr.12112>.
- Sigalow, Emily, Michelle Shain, and Meredith R. Bergey. 2012. "Religion and Decisions About Marriage, Residence, Occupation, and Children." *Journal for the Scientific Study of Religion* 51 (2): 304–23. <https://doi.org/10.1111/j.1468-5906.2012.01641.x>.
- Silva, Chikako Ozawa-de, and Brendan Ozawa-de Silva. 2010. "Secularizing Religious Practices: A Study of Subjectivity and Existential Transformation in Naikan Therapy." *Journal for the Scientific Study of Religion* 49 (1): 147–61. <https://doi.org/10.1111/j.1468-5906.2010.01497.x>.
- Skirbekk, Vegard, Eric Kaufmann, and Anne Goujon. 2010. "Secularism, Fundamentalism, or Catholicism? The Religious Composition of the United States to 2043." *Journal for the Scientific Study of Religion* 49 (2): 293–310. <https://doi.org/10.1111/j.1468-5906.2010.01510.x>.
- Skirbekk, Vegard, Éric Caron Malenfant, Stuart Basten, and Marcin Stonawski. 2012. "The Religious Composition of the Chinese Diaspora, Focusing on Canada." *Journal for the Scientific Study of Religion* 51 (1): 173–83. <https://doi.org/10.1111/j.1468-5906.2012.01618.x>.
- Small, Jenny L., and Nicholas A. Bowman. 2011. "Religious Commitment, Skepticism, and Struggle Among U.S. College Students: The Impact of Majority/Minority Religious Affiliation and Institutional Type." *Journal for the Scientific Study of Religion* 50 (1): 154–74. <https://doi.org/10.1111/j.1468-5906.2010.01557.x>.
- Smidt, Corwin E. 2019. "Reassessing the Concept and Measurement of Evangelicals: The Case for the RELTRAD Approach." *Journal for the Scientific Study of Religion* 58 (4): 833–53. <https://doi.org/10.1111/jssr.12633>.
- Smith, Amy Erica, and Robin Globus Veldman. 2020. "Evangelical Environmentalists? Evidence from Brazil." *Journal for the Scientific Study of Religion* n/a (n/a). <https://doi.org/10.1111/jssr.12656>.

- Smith, Buster G., and Byron Johnson. 2010. "The Liberalization of Young Evangelicals: A Research Note." *Journal for the Scientific Study of Religion* 49 (2): 351–60. <https://doi.org/10.1111/j.1468-5906.2010.01514.x>.
- Smith, Christian. 2010. "Five Proposals for Reforming Article Publishing in the Social Scientific Study of Religion (Especially Quantitative): Improving the Quality, Value, and Cumulativeness of Our Scholarship." *Journal for the Scientific Study of Religion* 49 (4): 583–95. <https://doi.org/10.1111/j.1468-5906.2010.01532.x>.
- Smith, Gregory A., Elizabeth Podrebarac Sciupac, Claire Gecewicz, and Conrad Hackett. 2018. "Comparing the RELTRAD and Born-Again/Evangelical Self-Identification Approaches to Measuring American Protestantism." *Journal for the Scientific Study of Religion* 57 (4): 830–47. <https://doi.org/10.1111/jssr.12550>.
- Smith, Jesse M. 2013. "Creating a Godless Community: The Collective Identity Work of Contemporary American Atheists." *Journal for the Scientific Study of Religion* 52 (1): 80–99. <https://doi.org/10.1111/jssr.12009>.
- Smith, Jesse M., and Ryan T. Cragun. 2019. "Mapping Religion's Other: A Review of the Study of Nonreligion and Secularity." *Journal for the Scientific Study of Religion* 58 (2): 319–35. <https://doi.org/10.1111/jssr.12597>.
- Smith, Tom W. 2018. "Response to Measuring Religious Identification in the United States." *Journal for the Scientific Study of Religion* 57 (4): 795–99. <https://doi.org/10.1111/jssr.12558>.
- Smits, Fransje, Stijn Ruiter, and Frank Van Tubergen. 2010. "Religious Practices Among Islamic Immigrants: Moroccan and Turkish Men in Belgium." *Journal for the Scientific Study of Religion* 49 (2): 247–63. <https://doi.org/10.1111/j.1468-5906.2010.01507.x>.
- Smits, Fransje, and Wout Ultee. 2013. "Examining Trends in Muslim Self-Identification and Mosque Attendance Among People of Turkish and Moroccan Descent in the Netherlands, 1997–2009." *Journal for the Scientific Study of Religion* 52 (3): 596–616. <https://doi.org/10.1111/jssr.12047>.
- Son, Joonmo, and John Wilson. 2011. "Religiosity, Psychological Resources, and Physical Health." *Journal for the Scientific Study of Religion* 50 (3): 588–603. <https://doi.org/10.1111/j.1468-5906.2011.01588.x>.
- Stack, Steven, and Augustine J. Kposowa. 2011. "Religion and Suicide Acceptability: A Cross-National Analysis." *Journal for the Scientific Study of Religion* 50 (2): 289–306. <https://doi.org/10.1111/j.1468-5906.2011.01568.x>.
- Starr, Chelsea, Kristin Waldo, and Matthew Kauffman. 2019. "Digital Irreligion: Christian Deconversion in an Online Community." *Journal for the Scientific Study of Religion* 58 (2): 494–512. <https://doi.org/10.1111/jssr.12599>.
- Steckler, Rebecca A., and John P. Bartkowski. 2018. "'God Is My First Aid Kit': The Negotiation of Health and Illness among Christian Scientists." *Journal for the Scientific Study of Religion* 57 (3): 585–603. <https://doi.org/10.1111/jssr.12533>.
- Steensland, Brian, Xiaoyun Wang, and Lauren Chism Schmidt. 2018. "Spirituality: What Does It Mean and to Whom?: The Meaning of Spirituality among Americans." *Journal for the Scientific Study of Religion* 57 (3): 450–72. <https://doi.org/10.1111/jssr.12534>.
- Steensland, Brian, Robert D. Woodberry, and Jerry Z. Park. 2018. "Structure, Placement, and the Quest for Unidimensional Purity in Typologies of American Denominations." *Journal for the Scientific Study of Religion* 57 (4): 800–806. <https://doi.org/10.1111/jssr.12559>.
- Stolz, Jörg, and Olivier Favre. 2019. "Growth and Decline of Evangelicals, Fundamentalists, Pentecostals, and Charismatics in Switzerland 1970–2013." *Journal for the Scientific Study of Religion* 58 (3): 604–25. <https://doi.org/10.1111/jssr.12616>.
- Strawn, Kelley D. 2019. "What's Behind the 'Nones-Sense'? Change Over Time in Factors Predicting Likelihood of Religious Nonaffiliation in the United States." *Journal for the Scientific Study of Religion* 58 (3): 707–24. <https://doi.org/10.1111/jssr.12609>.
- Sturgis, Paul W., and Robert D. Baller. 2012. "Religiosity and Deviance: An Examination of the Moral Community and Antiasceticism Hypotheses Among U.S. Adults." *Journal for the Scientific Study of Religion* 51 (4): 809–20. <https://doi.org/10.1111/j.1468-5906.2012.01681.x>.
- Sullivan, Allison R. 2010. "Mortality Differentials and Religion in the United States: Religious Affiliation and Attendance." *Journal for the Scientific Study of Religion* 49 (4): 740–53. <https://doi.org/10.1111/j.1468-5906.2010.01543.x>.
- Svensson, Isak. 2016. "Conceptualizing the Religious Dimensions of Armed Conflicts: A Response to 'Shrouded: Islam, War, and Holy War in Southeast Asia.'" *Journal for the Scientific Study of Religion* 55 (1): 185–89. <https://doi.org/10.1111/jssr.12251>.
- T, Oth Vilaythong, Nicole M. Lindner, and Brian A. Nosek. 2010. "'Do Unto Others': Effects of Priming the Golden Rule on Buddhists' and Christians' Attitudes Toward Gay People." *Journal for the Scientific Study of Religion* 49 (3): 494–506. <https://doi.org/10.1111/j.1468-5906.2010.01524.x>.

- Testoni, Ines, Emilio Paolo Visintin, Dora Capozza, Maria Concetta Carlucci, and Malihe Shams. 2016. "The Implicit Image of God: God as Reality and Psychological Well-Being." *Journal for the Scientific Study of Religion* 55 (1): 174–84. <https://doi.org/10.1111/jssr.12252>.
- Thiessen, Joel, and Sarah Wilkins-Laflamme. 2017. "Becoming a Religious None: Irreligious Socialization and Disaffiliation." *Journal for the Scientific Study of Religion* 56 (1): 64–82. <https://doi.org/10.1111/jssr.12319>.
- Thomas, Jeremy N. 2013. "Outsourcing Moral Authority: The Internal Secularization of Evangelicals' Anti-Pornography Narratives." *Journal for the Scientific Study of Religion* 52 (3): 457–75. <https://doi.org/10.1111/jssr.12052>.
- Thomas, Jeremy N., and Daniel V. A. Olson. 2010. "Testing the Strictness Thesis and Competing Theories of Congregational Growth." *Journal for the Scientific Study of Religion* 49 (4): 619–39. <https://doi.org/10.1111/j.1468-5906.2010.01534.x>.
- Thomas, Jeremy N., and Andrew L. Whitehead. 2015. "Evangelical Elites' Anti-Homosexuality Narratives as a Resistance Strategy Against Attribution Effects." *Journal for the Scientific Study of Religion* 54 (2): 345–62. <https://doi.org/10.1111/jssr.12188>.
- Thomson Jr., Robert A., and Paul Froese. 2016. "God Versus Party: Competing Effects on Attitudes Concerning Criminal Punishment, National Security, and Military Service." *Journal for the Scientific Study of Religion* 55 (4): 839–58. <https://doi.org/10.1111/jssr.12293>.
- Thomson, Robert A., Sharan Kaur Mehta, and Elaine Howard Ecklund. 2020. "'Doing Gender' and 'Doing Religion' in Science: A Cross-National Examination." *Journal for the Scientific Study of Religion* First published online. <https://doi.org/10.1111/jssr.12654>.
- Tongeren, Daryl R. Van, Jennifer M. Raad, Daniel N. McIntosh, and Jessica Pae. 2013. "The Existential Function of Intrinsic Religiousness: Moderation of Effects of Priming Religion on Intercultural Tolerance and Afterlife Anxiety." *Journal for the Scientific Study of Religion* 52 (3): 508–23. <https://doi.org/10.1111/jssr.12053>.
- Torgler, Benno, and Christoph Schaltegger. 2014. "Suicide and Religion: New Evidence on the Differences Between Protestantism and Catholicism." *Journal for the Scientific Study of Religion* 53 (2): 316–40. <https://doi.org/10.1111/jssr.12117>.
- Tubergen, Frank Van, and Jörunn Í Sindradóttir. 2011. "The Religiosity of Immigrants in Europe: A Cross-National Study." *Journal for the Scientific Study of Religion* 50 (2): 272–88. <https://doi.org/10.1111/j.1468-5906.2011.01567.x>.
- Uecker, Jeremy E. 2014. "Religion and Early Marriage in the United States: Evidence from the Add Health Study." *Journal for the Scientific Study of Religion* 53 (2): 392–415. <https://doi.org/10.1111/jssr.12114>.
- Uecker, Jeremy E., and Christopher G. Ellison. 2012. "Parental Divorce, Parental Religious Characteristics, and Religious Outcomes in Adulthood." *Journal for the Scientific Study of Religion* 51 (4): 777–94. <https://doi.org/10.1111/j.1468-5906.2012.01679.x>.
- Uecker, Jeremy E., and Glenn Lucke. 2011. "Protestant Clergy and the Culture Wars: An Empirical Test of Hunter's Thesis." *Journal for the Scientific Study of Religion* 50 (4): 692–706. <https://doi.org/10.1111/j.1468-5906.2011.01601.x>.
- Uecker, Jeremy E., Damon Mayrl, and Samuel Stroope. 2016. "Family Formation and Returning to Institutional Religion in Young Adulthood." *Journal for the Scientific Study of Religion* 55 (2): 384–406. <https://doi.org/10.1111/jssr.12271>.
- Vaidyanathan, Brandon. 2011. "Religious Resources or Differential Returns? Early Religious Socialization and Declining Attendance in Emerging Adulthood." *Journal for the Scientific Study of Religion* 50 (2): 366–87. <https://doi.org/10.1111/j.1468-5906.2011.01573.x>.
- Vaidyanathan, Brandon, Jonathan P. Hill, and Christian Smith. 2011. "Religion and Charitable Financial Giving to Religious and Secular Causes: Does Political Ideology Matter?" *Journal for the Scientific Study of Religion* 50 (3): 450–69. <https://doi.org/10.1111/j.1468-5906.2011.01584.x>.
- Van der Bracht, Koen, Roselien Vervaeke, Fanny D'hondt, Peter Stevens, Bart Van de Putte, and Mieke Van Houtte. 2017. "School Context and Ethnic Minority Adolescent Religiosity: A Longitudinal Study." *Journal for the Scientific Study of Religion* 56 (3): 658–66. <https://doi.org/10.1111/jssr.12359>.
- Van Droogenbroeck, Filip, Bram Spruyt, Jessy Siongers, and Gil Keppens. 2016. "Religious Quest Orientation and Anti-Gay Sentiment: Nuancing the Relationship Between Religiosity and Negative Attitudes Toward Homosexuality Among Young Muslims and Christians in Flanders." *Journal for the Scientific Study of Religion* 55 (4): 787–99. <https://doi.org/10.1111/jssr.12303>.

- VanHeuvelen, Tom. 2014. "The Religious Context of Welfare Attitudes." *Journal for the Scientific Study of Religion* 53 (2): 268–95. <https://doi.org/10.1111/jssr.12118>.
- Vazsonyi, Alexander T., and Dusty D. Jenkins. 2010. "Religiosity, Self-Control, and Virginity Status in College Students from the 'Bible Belt': A Research Note." *Journal for the Scientific Study of Religion* 49 (3): 561–68. <https://doi.org/10.1111/j.1468-5906.2010.01529.x>.
- Veković, Marko, and Veljko Đogatović. 2019. "Errando Discimus: Has Post-Yugoslav Political and Social Science Neglected Religion?" *Journal for the Scientific Study of Religion* 58 (3): 753–63. <https://doi.org/10.1111/jssr.12611>.
- Vezzoni, Cristiano, and Ferruccio Biolcati-Rinaldi. 2015. "Church Attendance and Religious Change in Italy, 1968–2010: A Multilevel Analysis of Pooled Datasets." *Journal for the Scientific Study of Religion* 54 (1): 100–118. <https://doi.org/10.1111/jssr.12173>.
- Village, Andrew, and Sylvia Baker. 2013. "Rejection of Darwinian Evolution Among Churchgoers in England: The Effects of Psychological Type." *Journal for the Scientific Study of Religion* 52 (3): 557–72. <https://doi.org/10.1111/jssr.12049>.
- Voas, David. 2010. "Value Liberalization or Consumption: Comment on Hirschle's Analysis of Ireland's Economic Boom and the Decline in Church Attendance." *Journal for the Scientific Study of Religion* 49 (4): 688–90. <https://doi.org/10.1111/j.1468-5906.2010.01537.x>.
- — —. 2014. "Does Education Develop or Diminish Spirituality in Taiwan?" *Journal for the Scientific Study of Religion* 53 (3): 556–74. <https://doi.org/10.1111/jssr.12128>.
- Wang, Ray. 2017. "Authoritarian Resilience Versus Everyday Resistance: The Unexpected Strength of Religious Advocacy in Promoting Transnational Activism in China." *Journal for the Scientific Study of Religion* 56 (3): 558–76. <https://doi.org/10.1111/jssr.12366>.
- Wei, Dedong, and Eric Y. Liu. 2013. "Religious Involvement and Depression: Evidence for Curvilinear and Stress-Moderating Effects Among Young Women in Rural China." *Journal for the Scientific Study of Religion* 52 (2): 349–67. <https://doi.org/10.1111/jssr.12031>.
- Whitehead, Andrew L. 2010. "Financial Commitment Within Federations of Small Groups: The Effect of Cell-Based Congregational Structure on Individual Giving." *Journal for the Scientific Study of Religion* 49 (4): 640–56.
- — —. 2013. "Gendered Organizations and Inequality Regimes: Gender, Homosexuality, and Inequality Within Religious Congregations." *Journal for the Scientific Study of Religion* 52 (3): 476–93. <https://doi.org/10.1111/jssr.12051>.
- — —. 2014. "Male and Female He Created Them: Gender Traditionalism, Masculine Images of God, and Attitudes Toward Same-Sex Unions." *Journal for the Scientific Study of Religion* 53 (3): 479–96. <https://doi.org/10.1111/jssr.12130>.
- — —. 2017. "Institutionalized Norms, Practical Organizational Activity, and Loose Coupling: Inclusive Congregations' Responses to Homosexuality." *Journal for the Scientific Study of Religion* 56 (4): 820–35. <https://doi.org/10.1111/jssr.12484>.
- — —. 2018. "Religion and Disability: Variation in Religious Service Attendance Rates for Children with Chronic Health Conditions." *Journal for the Scientific Study of Religion* 57 (2): 377–95. <https://doi.org/10.1111/jssr.12521>.
- Wilkins-Laflamme, Sarah. 2016. "Secularization and the Wider Gap in Values and Personal Religiosity Between the Religious and Nonreligious." *Journal for the Scientific Study of Religion* 55 (4): 717–36. <https://doi.org/10.1111/jssr.12307>.
- Wilkinson, Renae. 2018. "Losing or Choosing Faith: Mother Loss and Religious Change." *Journal for the Scientific Study of Religion* 57 (4): 758–78. <https://doi.org/10.1111/jssr.12542>.
- Williams, Rhys H. 2013. "Civil Religion and the Cultural Politics of National Identity in Obama's America." *Journal for the Scientific Study of Religion* 52 (2): 239–57. <https://doi.org/10.1111/jssr.12032>.
- Williams, Ryan J. 2013. "Network Hubs and Opportunity for Complex Thinking Among Young British Muslims." *Journal for the Scientific Study of Religion* 52 (3): 573–95. <https://doi.org/10.1111/jssr.12050>.
- Williams, Ryan J., and Fraser N. Watts. 2014. "Attributions in a Spiritual Healing Context: An Archival Analysis of a 1920s Healing Movement." *Journal for the Scientific Study of Religion* 53 (1): 90–108. <https://doi.org/10.1111/jssr.12085>.
- Winchester, Daniel. 2015. "Converting to Continuity: Temporality and Self in Eastern Orthodox Conversion Narratives." *Journal for the Scientific Study of Religion* 54 (3): 439–60. <https://doi.org/10.1111/jssr.12211>.

- — —. 2017. "'A Part of Who I Am': Material Objects as 'Plot Devices' in the Formation of Religious Selves." *Journal for the Scientific Study of Religion* 56 (1): 83–103. <https://doi.org/10.1111/jssr.12318>.
- Woodell, Brandi, and Philip Schwadel. 2020. "Changes in Religiosity Among Lesbian, Gay, and Bisexual Emerging Adults." *Journal for the Scientific Study of Religion* n/a (n/a). <https://doi.org/10.1111/jssr.12653>.
- Woods, Orlando. 2012. "Sri Lanka's Informal Religious Economy: Evangelical Competitiveness and Buddhist Hegemony in Perspective." *Journal for the Scientific Study of Religion* 51 (2): 203–19. <https://doi.org/10.1111/j.1468-5906.2012.01642.x>.
- — —. 2018. "Spaces of the Religious Economy: Negotiating the Regulation of Religious Space in Singapore." *Journal for the Scientific Study of Religion* 57 (3): 531–46. <https://doi.org/10.1111/jssr.12531>.
- Wright, Bradley R. E. 2018. "Field Experiments in Religion: A Dream Whose Time Has Come." *Journal for the Scientific Study of Religion* 57 (2): 193–205. <https://doi.org/10.1111/jssr.12509>.
- Wright, Bradley R. E., Michael Wallace, Annie Scola Wisnesky, Christopher M. Donnelly, Stacy Missari, and Christine Zozula. 2015. "Religion, Race, and Discrimination: A Field Experiment of How American Churches Welcome Newcomers." *Journal for the Scientific Study of Religion* 54 (2): 185–204. <https://doi.org/10.1111/jssr.12193>.
- Wright, Stuart A., and Susan J. Palmer. 2018. "Countermovement Mobilization and State Raids on Minority Religious Communities." *Journal for the Scientific Study of Religion* 57 (3): 616–33. <https://doi.org/10.1111/jssr.12541>.
- Wulff, David M. 2019. "Prototypes of Faith: Findings with the Faith Q-Sort." *Journal for the Scientific Study of Religion* 58 (3): 643–65. <https://doi.org/10.1111/jssr.12615>.
- Wuthnow, Robert J. 2011. "Taking Talk Seriously: Religious Discourse as Social Practice." *Journal for the Scientific Study of Religion* 50 (1): 1–21. <https://doi.org/10.1111/j.1468-5906.2010.01549.x>.
- Yamane, David. 2016. "Awash in a Sea of Faith and Firearms: Rediscovering the Connection Between Religion and Gun Ownership in America." *Journal for the Scientific Study of Religion* 55 (3): 622–36. <https://doi.org/10.1111/jssr.12282>.
- Yang, Fenggang. 2016. "Exceptionalism or Chinamerica: Measuring Religious Change in the Globalizing World Today." *Journal for the Scientific Study of Religion* 55 (1): 7–22. <https://doi.org/10.1111/jssr.12253>.
- Yang, Fenggang, and Anning Hu. 2012. "Mapping Chinese Folk Religion in Mainland China and Taiwan." *Journal for the Scientific Study of Religion* 51 (3): 505–21. <https://doi.org/10.1111/j.1468-5906.2012.01660.x>.
- Yang, Xiaozhao Yousef, and Fenggang Yang. 2017. "Estimating Religious Populations with the Network Scale-Up Method: A Practical Alternative to Self-Report." *Journal for the Scientific Study of Religion* 56 (4): 703–19. <https://doi.org/10.1111/jssr.12479>.
- Yeniaras, Volkan, and K. Ali Akkemik. 2017. "Materialism and Fashion Consciousness: The Moderating Role of Status Consumption Tendencies and Religiosity." *Journal for the Scientific Study of Religion* 56 (3): 498–513. <https://doi.org/10.1111/jssr.12363>.
- Yi, Joseph, and Daniel Silver. 2015. "God, Yoga, and Karate." *Journal for the Scientific Study of Religion* 54 (3): 596–615. <https://doi.org/10.1111/jssr.12218>.
- Yukich, Grace, and Ruth Braunstein. 2014. "Encounters at the Religious Edge: Variation in Religious Expression Across Interfaith Advocacy and Social Movement Settings." *Journal for the Scientific Study of Religion* 53 (4): 791–807. <https://doi.org/10.1111/jssr.12142>.
- Zhai, Jiexia Elisa, and Robert D. Woodberry. 2011. "Religion and Educational Ideals in Contemporary Taiwan." *Journal for the Scientific Study of Religion* 50 (2): 307–27. <https://doi.org/10.1111/j.1468-5906.2011.01569.x>.
- Zubrzycki, Geneviève. 2012. "Religion, Religious Tradition, and Nationalism: Jewish Revival in Poland and 'Religious Heritage' in Québec." *Journal for the Scientific Study of Religion* 51 (3): 442–55. <https://doi.org/10.1111/j.1468-5906.2012.01666.x>.
- Zukerman, Gil, Liat Korn, Ephraim Shapiro, and Leah Fostick. 2016. "Avoidance Behavior Following Terror Event Exposure: Effects of Perceived Life Threat and Jewish Religious Coping." *Journal for the Scientific Study of Religion* 55 (3): 516–30. <https://doi.org/10.1111/jssr.12283>.
